# Supplementary material for: Copper-catalyzed aerobic carboxygenation and N-arylation of [1,2,3]triazolo[1,5-a]pyridines towards pyridinium triazolinone ylides
Source: Royal Society of Chemistry journal article supplement (doi:10.1039/c4cc10061a), 2015-01-01

## **Supporting Information**

## Table of Contents

|                                                                                       |    |
|---------------------------------------------------------------------------------------|----|
| I. General methods.....                                                               | 2  |
| II. General procedure.....                                                            | 3  |
| i. Synthesis of [1,2,3]Triazolo[1,5-a]pyridine Substrates.....                        | 3  |
| ii. Reaction optimization Studies.....                                                | 4  |
| iii. Optimized procedure for the catalysis reaction.....                              | 8  |
| iv. Procedure for the catalysis reaction under $^{18}\text{O}$ atmosphere.....        | 8  |
| v. Procedure for the catalysis reaction in the presence of radical inhibitor BTC..... | 9  |
| vi. Procedure for the palladium-catalyzed c7-arylation of <b>2a</b> .....             | 9  |
| vii. Procedure for the catalytic hydrogenation of <b>2b</b> .....                     | 9  |
| III. Analytical data.....                                                             | 10 |
| i. Analytical data for the Triazolopyridine substrates.....                           | 10 |
| ii. Analytical data for Pyridinium ylide products.....                                | 15 |
| iii. X-ray crystal structures of <b>2a</b> and <b>3a</b> .....                        | 28 |
| IV. Spectral images.....                                                              | 29 |

## I. General Methods

All reagents were either commercially purchased or synthesized according to literature reports and were used as such for the reactions.  $^{18}\text{O}$  cylinder was purchased from Aldrich. All reactions were conducted in over-dried glassware. Thin Layer Chromatography (TLC) was conducted using Merck silica gel 60 and flash column chromatography was performed using Merck silica gel 60.  $^1\text{H}$  NMR was conducted on Bruker avance 300, Bruker avance 400 spectrometer and are reported in ppm as  $\text{SiMe}_4$  as the reference relative to chloroform- $d$  ( $\delta = 7.26$ , singlet). Coupling data reported as: s = singlet, d = doublet, dd = doublet of doublet, dt = doublet of triplet, td = triplet of doublet, m = multiplet; coupling constant(s) in Hz. In addition, proton-decoupled  $^{13}\text{C}$  NMR spectra were performed on Bruker avance 300 (75 MHz) and Bruker avance 400 (101 MHz) spectrometer and are reported in ppm using  $\text{CDCl}_3$  as the internal standard. High resolution mass spectral analysis (HRMS) was performed on Waters Q-ToF microTOF MS spectrometer. IR spectra were recorded as thin films on NaCl plates on a Bio-Rad FTS 165 FTIR spectrometer and were reported in frequency of absorption ( $\text{cm}^{-1}$ ).

## II. General procedure

### i. Synthesis of [1,2,3]Triazolo[1,5-a]pyridine Substrates

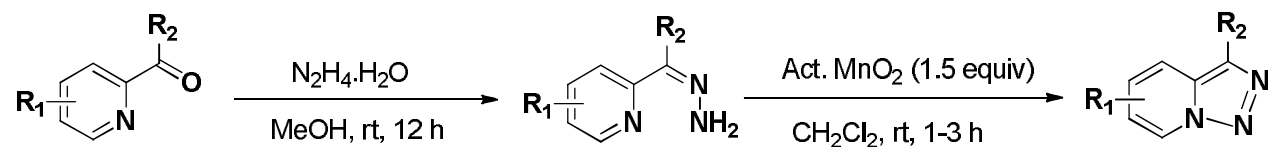

1 mmol (1 equiv) of pyridine carboxaldehyde/ketone was added to a solution of hydrazine monohydrate (3 mmol, 3.0 equiv) in 2 mL of methanol. The solution was stirred at  $\text{rt}$  for overnight before removing the solvent. Dichloromethane was added to the crude solid and the organic layer was extracted through aqueous work-up. The extract was dried using magnesium sulfate and the solvent was removed after filtration. The resulting hydrazone product was dissolved in 3 mL of dichloromethane and activated  $\text{MnO}_2$  (approximately 1.5 equiv) was added in portions. The suspension was stirred at  $\text{rt}$  and the conversion was tracked using TLC. Upon

completion (1-3 h), the solid residue was filtered-out through celite and the triazolopyridine product was isolated through silica gel column chromatography.

## ii. Copper-catalyzed aerobic carboxygenation and N-arylation of [1,2,3]Triazolo[1,5-a]pyridines: Optimization Studies

### ii.a. Catalyst screening

To an oven-dried screw-cap vial (a schlenk tube was used for those reactions that were conducted under an oxygen atmosphere) was added the [1,2,3]triazolo[1,5-a]pyridine (0.1 mmol, 1 equiv), phenyl(mesityl)iodonium triflate (0.12 mmol, 1.2 equiv), metal catalyst (20% mmol), ligand (if any) and Cs<sub>2</sub>CO<sub>3</sub> (0.2 mmol, 1.5 equiv). 1 mL of dry DCE was added and the reaction mixture was heated at 80 °C till consumption of the triazole completed (as per TLC). The brown suspension was filtered through celite and the filtrate was concentrated by vacuum and purified through silica gel (basified with triethylamine) column chromatography (hexane/ethyl acetate) to afford the desired product.

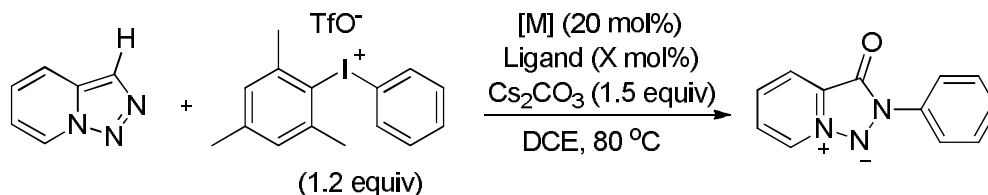

| Entry | [M] (20 mol%)        | Ligand/additive | Time (h) | Yield (%)   |
|-------|----------------------|-----------------|----------|-------------|
| 1     | Cu(OTf) <sub>2</sub> | –               | 12       | No reaction |
| 2     | CuCN                 | –               | 12       | 15          |
| 3     | CuI                  | –               | 12       | 34          |
| 4     | CuBr                 | –               | 15       | 32          |
| 5     | Cu(OAc) <sub>2</sub> | –               | 12       | No reaction |
| 6     | CuBr <sub>2</sub>    | –               | 12       | 28          |

|                        |                                           |                                         |          |             |
|------------------------|-------------------------------------------|-----------------------------------------|----------|-------------|
| 7                      | CuCl <sub>2</sub>                         | –                                       | 12       | 24          |
| 7                      | Cu(MeCN) <sub>4</sub> PF <sub>6</sub>     | –                                       | 12       | 41          |
| <b>8<sup>[a]</sup></b> | <b>Cu(MeCN)<sub>4</sub>PF<sub>6</sub></b> | –                                       | <b>4</b> | <b>62</b>   |
| 9 <sup>[a] [b]</sup>   | Cu(MeCN) <sub>4</sub> PF <sub>6</sub>     | –                                       | 5        | 38          |
| 10 <sup>[a] [c]</sup>  | Cu(MeCN) <sub>4</sub> PF <sub>6</sub>     | –                                       | 24       | 28          |
| 11 <sup>[a] [d]</sup>  | Cu(MeCN) <sub>4</sub> PF <sub>6</sub>     | –                                       | 4        | 60          |
| 12 <sup>[a]</sup>      | Cu(MeCN) <sub>4</sub> PF <sub>6</sub>     | 1,10-phenanthroline (20 mol%)           | 6        | 37          |
| 13 <sup>[a]</sup>      | Cu(MeCN) <sub>4</sub> PF <sub>6</sub>     | PPh <sub>3</sub> (40 mol%)              | 6        | No reaction |
| 14 <sup>[a]</sup>      | Cu(MeCN) <sub>4</sub> PF <sub>6</sub>     | TMEDA (20 mol%)                         | 6        | 15          |
| 15 <sup>[a]</sup>      | Cu(MeCN) <sub>4</sub> PF <sub>6</sub>     | 2,2'-bipyridyl (20 mol%)                | 8        | 20          |
| 16 <sup>[a]</sup>      | Cu(MeCN) <sub>4</sub> PF <sub>6</sub>     | H <sub>2</sub> O (50 mol%)              | 8        | 25          |
| 17 <sup>[a]</sup>      | Cu(MeCN) <sub>4</sub> PF <sub>6</sub>     | H <sub>2</sub> O <sub>2</sub> (2 equiv) | 8        | 15          |
| 18 <sup>[a]</sup>      | PdCl <sub>2</sub>                         | PPh <sub>3</sub> (40 mol%)              | 12       | No reaction |
| 19 <sup>[a]</sup>      | AuCl                                      | -                                       | 12       | No reaction |
| 20 <sup>[a]</sup>      | FeCl <sub>2</sub>                         | -                                       | 12       | No reaction |
| 21 <sup>[a]</sup>      | -                                         | -                                       | 12       | No reaction |

<sup>[a]</sup> Reaction carried-out under an oxygen balloon. <sup>[b]</sup> Reaction carried-out with 10 mol% of the catalyst. <sup>[c]</sup> Reaction carried-out at 50 °C. <sup>[d]</sup> Reaction carried-out at 90 °C. At 90 °C, formation of phenylacetamide which was derived from an aerobic oxidation reaction between the iodonium triflate and the acetonitrile ligand of the copper-catalyst was observed<sup>1</sup>.

1. S-K Xiang, D-X. Zhang, H. Hu, J-L. Shi, L-G. Liao, C. Feng, B-Q. Wang, K-Q. Zhao, P. Hu, H. Yang, W-H. Yu, *Adv. Synth. Catal.* 2013, **355**, 1495

## iib. Screening of the Base

To an oven-dried schlenk tube was added the [1,2,3]triazolo[1,5-a]pyridine (0.1 mmol, 1 equiv), phenyl(mesityl)iodonium triflate (0.12 mmol, 1.2 equiv),  $\text{Cu}(\text{MeCN})_4\text{PF}_6$  (20% mmol), and the base (0.15 mmol, 1.5 equiv). The tube was sealed and was evacuated and refilled with molecular oxygen (using an oxygen balloon, repeated three times). 1 mL of dry DCE was added and molecular oxygen was bubbled through the solution for a few seconds. The reaction mixture was then heated at 80 °C under an oxygen balloon till consumption of the triazole was observed through TLC. The brown suspension was filtered through celite and the filtrate was concentrated by vacuum and purified through silica gel (basified with triethyl amine) column chromatography (hexane/ethyl acetate) to afford the desired product.

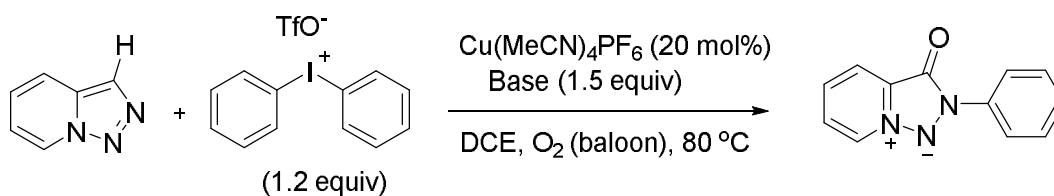

| Entry                   | Base                                       | Time (h) | Yield (%)   |
|-------------------------|--------------------------------------------|----------|-------------|
| 1                       | $\text{K}_3\text{PO}_4$                    | 5        | Decomposed  |
| 2                       | $\text{CsOAc}$                             | 5        | No reaction |
| 3                       | $\text{K}_2\text{CO}_3$                    | 5        | Decomposed  |
| 5                       | 2,6-di-tert-butylpyridine                  | 5        | Decomposed  |
| 6                       | $\text{NaOH}$                              | 5        | 10          |
| 7                       | $\text{Na}_2\text{CO}_3$                   | 5        | 30          |
| 8                       | $\text{Cs}_2\text{CO}_3$                   | 4        | 65          |
| 9 <sup>[a]</sup>        | $\text{Cs}_2\text{CO}_3$                   | 6        | 43          |
| <b>10<sup>[b]</sup></b> | <b><math>\text{Cs}_2\text{CO}_3</math></b> | <b>4</b> | <b>73</b>   |
| 10                      | -                                          | 2        | Decomposed  |

<sup>[a]</sup> Reaction done with 1 equiv of the base. <sup>[b]</sup> Reaction done with 2 equiv of the base

### iic. Screening of solvents

To an oven-dried schlenk tube was added the [1,2,3]triazolo[1,5-a]pyridine (0.1 mmol, 1 equiv), phenyl(mesityl)iodonium triflate (0.12 mmol, 1.2 equiv),  $\text{Cu}(\text{MeCN})_4\text{PF}_6$  (20% mmol), and  $\text{Cs}_2\text{CO}_3$  (0.2 mmol, 2 equiv). The tube was sealed and was evacuated and refilled with molecular oxygen (using an oxygen balloon, repeated three times). 1 mL of dry solvent was added and molecular oxygen was bubbled through the solution for a few seconds. The reaction mixture was then heated at 80 °C under an oxygen balloon till consumption of the triazole was observed through TLC. The brown suspension was filtered through celite and the filtrate was concentrated by vacuum and purified through silica gel (basified with triethylamine) column chromatography (hexane/ethyl acetate) to afford the desired product.

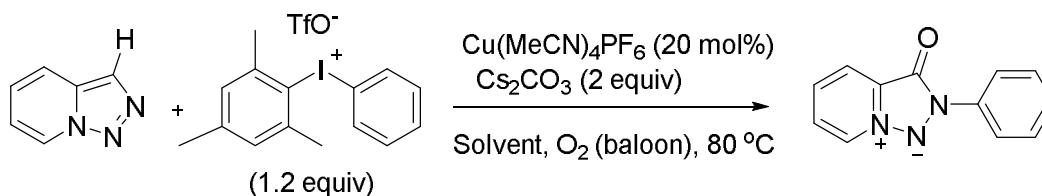

| Entry | Solvent | Time (h) | Yield (%)   |
|-------|---------|----------|-------------|
| 1     | DMF     | 3        | Decomposed  |
| 2     | t-BuOH  | 3        | Decomposed  |
| 3     | Dioxane | 24       | No reaction |
| 4     | Toluene | 12       | 20          |
| 5     | DCE     | 4        | 70          |

### iiid. Screening of the stoichiometry for the triflate salt.

To an oven-dried schlenk tube was added the [1,2,3]triazolo[1,5-a]pyridine (0.1 mmol, 1 equiv), phenyl(mesityl)iodonium triflate (0.X mmol, X equiv),  $\text{Cu}(\text{MeCN})_4\text{PF}_6$  (20% mmol), and  $\text{Cs}_2\text{CO}_3$  (0.2 mmol, 2 equiv). The tube was sealed and was evacuated and refilled with molecular oxygen (using an oxygen balloon, repeated three times). 1 mL of dry solvent was added and molecular oxygen was bubbled through the solution for a few seconds. The reaction mixture was

then heated at 80 °C under an oxygen balloon till consumption of the triazole was observed through TLC. The brown suspension was filtered through celite and the filtrate was concentrated by vacuum and purified through silica gel (basified with triethylamine) column chromatography (hexane/ethyl acetate) to afford the desired product.

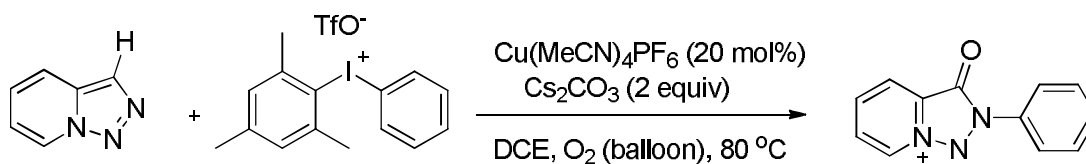

| Entry    | Triflate salt<br>(number of equiv) | Time (h) | Yield (%)     |
|----------|------------------------------------|----------|---------------|
| <b>1</b> | <b>1.2</b>                         | <b>4</b> | <b>73</b>     |
| 2        | 1.5                                | 4        | 68            |
| 3        | 2.0                                | 4        | 60            |
| 4        | 0                                  | 2        | decomposition |

### iii. Optimized procedure for the catalysis reaction

To an oven-dried schlenk tube was added the triazolopyridine (0.1 mmol, 1 equiv), phenyl(mesityl)iodonium triflate (0.12 mmol, 1.2 equiv),  $\text{Cu}(\text{MeCN})_4\text{PF}_6$  (20% mmol), and the base (0.2 mmol, 2 equiv). The tube was sealed and was evacuated and refilled with molecular oxygen (using an oxygen balloon, repeated three times). 1 mL of dry DCE was added and molecular oxygen was bubbled through the solution for a few seconds. The reaction mixture was then heated at 80 °C under an oxygen balloon till consumption of the triazole was observed through TLC. The brown suspension was filtered through celite and the filtrate was concentrated by vacuum and purified through silica gel (basified with triethylamine) column chromatography (hexane/ethyl acetate) to afford the desired product.

### iv. Procedure for the catalysis reaction under $^{18}\text{O}$ atmosphere.

To an oven-dried schlenk tube was added 13 mg of 7-methyl-[1,2,3]triazolo[1,5-a]pyridine **1b** (0.1 mmol, 1 equiv), 57 mg of phenyl(mesityl)iodonium triflate (0.12 mmol, 1.2 equiv), 7.5 mg



of  $\text{Cu}(\text{MeCN})_4\text{PF}_6$  (20% mmol), and 65 mg of  $\text{Cs}_2\text{CO}_3$  (0.2 mmol, 2 equiv). The tube was sealed and was evacuated and refilled with  $^{18}\text{O}$  (which was collected into a thick evacuated balloon from a 1-liter  $^{18}\text{O}$  cylinder). 1 mL of dry DCE was added and the reaction mixture was then heated at 80 °C under the  $^{18}\text{O}$ -balloon till the starting triazole consumed (4 h). The brown suspension was filtered through celite and the filtrate was concentrated by vacuum and purified through silica gel (basified with triethylamine) column chromatography (hexane/ethyl acetate) to afford the desired product **2b'** as an yellow solid (95%).

#### **v. Procedure for the catalysis reaction in the presence of radical inhibitor BTC**

To an oven-dried schlenk tube was added 13 mg of 7-methyl-[1,2,3]triazolo[1,5-a]pyridine **1b** (0.1 mmol, 1 equiv), 57 mg of phenyl(mesityl)iodonium triflate (0.12 mmol, 1.2 equiv), 7.5 mg of  $\text{Cu}(\text{MeCN})_4\text{PF}_6$  (20% mmol), 22 mg of 2,6-Di-tert-butyl-p-cresol (0.1 mmol, 1 equiv) and 65 mg of  $\text{Cs}_2\text{CO}_3$  (0.2 mmol, 2 equiv). The tube was sealed and was evacuated and refilled with oxygen. 1 mL of dry DCE was added and the reaction mixture was then heated at 80 °C under the oxygen balloon. The TLC showed total decomposition within 1 h.

#### **vi. Procedure for the palladium-catalyzed C7-arylation of 2a**

To an oven-dried schlenk tube was added 26 mg (0.125 mmol, 1 equiv) of **2a**, 3 mg (10 mol%) of  $\text{Pd}(\text{OAc})_2$ , 6.5 mg (20 mol%) of  $\text{PPh}_3$ , 122 mg (0.38 mmol, 3 equiv) of  $\text{Cs}_2\text{CO}_3$ . 1 mL of dry toluene was added followed by 0.028 mL (0.25 mmol, 2 equiv) of phenyl iodide. The suspension was heated at 100 °C till the starting material was consumed (48 h). The reaction mixture was filtered over celite and the product was purified through silica gel column chromatography (Hexane/Ethyl acetate) to obtain 21 mg (58%) of the arylated product **3a** as an yellow solid.

#### **vii. Procedure for the catalytic hydrogenation of 2b**

To an oven-dried schlenk tube was added 21 mg (0.1 mmol, 1 equiv) of **2b**. The tube was evacuated and backfilled with nitrogen. 1 mL of methanol was added followed by a pinch of platinum on carbon. The reaction mixture was stirred at room temperature in the presence of a hydrogen balloon. The yellow color of the initial solution changed to colorless in 3 h and TLC showed the complete consumption of the starting material. Filtered over celite and the solvent

was removed under vacuum to obtain 22 mg of the partially hydrogenated product **4** as a white solid. No further purification was necessary.

### III. Analytical data

#### i. Analytical data for the Triazolopyridine substrates

##### 1. 7-methyl-[1,2,3]triazolo[1,5-a]pyridine (**1b**):

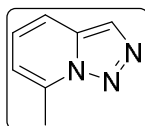

Pale yellow solid (76% overall isolated yield).

$R_f$  = 0.38 (1:1 Hexane:Ethyl acetate); M.P: 52-54 °C

$^1\text{H}$  NMR (400 MHz,  $\text{CDCl}_3$ )  $\delta$  (ppm): 2.79 (s, 3H), 6.70 (d,  $J$  = 9.2 Hz, 1H), 7.10-7.13 (m, 1H), 7.54 (d,  $J$  = 12 Hz, 1H), 8.01 (s, 1H)

$^{13}\text{C}$  NMR (101 MHz,  $\text{CDCl}_3$ )  $\delta$  (ppm): 17.03, 113.91, 115.01, 125.01, 125.60, 133.61, 135.25

IR (film) /  $\text{cm}^{-1}$ : 3053, 2986, 2305, 1422, 1265, 895, 738, 704

HRMS (ESI): Calculated for  $\text{C}_7\text{H}_7\text{N}_3$   $m/z$  134.0719, found 134.0722.

##### 2. 4-methyl-[1,2,3]triazolo[1,5-a]pyridine (**1c**)

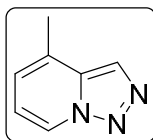

Pale white solid (78% overall yield)

$R_f$  = 0.36 (1:1 Hexane:Ethyl acetate); M.P: 54-57 °C

$^1\text{H}$  NMR (400 MHz,  $\text{CDCl}_3$ )  $\delta$  (ppm): 2.51 (s, 3H), 6.92-6.83 (m, 1H), 7.00-6.93 (m, 1H), 8.04-7.98 (m, 1H), 8.61-8.53 (m, 1H)

$^{13}\text{C}$  NMR (101 MHz,  $\text{CDCl}_3$ )  $\delta$  (ppm): 18.24, 115.44, 122.90, 123.97, 124.88, 128.69, 135.11

IR(film) /  $\text{cm}^{-1}$ : 3053, 2981, 2305, 1421, 1255, 895, 738, 704

HRMS (ESI): Calculated for  $\text{C}_7\text{H}_7\text{N}_3$   $m/z$ : 134.0719; found: 133.0722

3. 6-chloro-[1,2,3]triazolo[1,5-a]pyridine (**1d**)

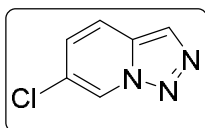

Pale yellow solid (66% overall yield)

$R_f$  = 0.43 (1:1 Hexane:Ethyl acetate); M.P: 94-96  $^{\circ}\text{C}$

$^1\text{H}$  NMR (400 MHz,  $\text{CDCl}_3$ )  $\delta$  (ppm): 7.16 (d,  $J$  = 9.4 Hz, 1H), 7.65 (d,  $J$  = 9.45 Hz, 1H), 8.00 (s, 1H), 8.71 (s, 1H)

$^{13}\text{C}$  NMR (101 MHz,  $\text{CDCl}_3$ )  $\delta$  (ppm): 118.14, 123.18, 123.96, 126.17, 127.01, 132.15

IR (film) /  $\text{cm}^{-1}$ : 3053, 2985, 2304, 1506, 1421, 1255, 738, 704

HRMS (ESI): calculated for  $\text{C}_6\text{H}_4\text{ClN}_3$   $m/z$  154.0173; found: 154.0176

4. 6-bromo-[1,2,3]triazolo[1,5-a]pyridine (**1e**)

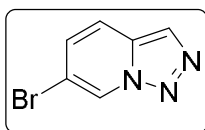

Pale white solid (72% overall yield)

$R_f$  = 0.41 (1:1 Hexane:Ethyl acetate); M.P: 88-90  $^{\circ}\text{C}$

$^1\text{H}$  NMR (400 MHz,  $\text{CDCl}_3$ )  $\delta$  (ppm): 7.35-7.28 (m, 1H), 7.63 (d,  $J$  = 9.30 Hz, 1H), 8.06 (s, 1H), 8.90 (s, 1H)

$^{13}\text{C}$  NMR (101 MHz,  $\text{CDCl}_3$ )  $\delta$  (ppm): 110.78, 118.40, 125.63, 126.38, 129.18, 132.40

IR (film) /  $\text{cm}^{-1}$ : 3053, 2985, 2304, 1506, 1421, 1255, 738, 704

HRMS (ESI): calculated for  $C_6H_4BrN_3$   $m/z$  197.9668; found: 197.9668

5. [1,2,3]triazolo[1,5-a]quinolone (**1f**)

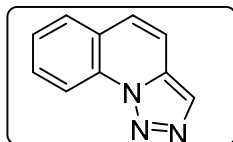

Pale yellow solid (65% overall yield)

$R_f$  = 0.38 (1:1 Hexane:Ethyl acetate); M.P: 110-114 °C

$^1H$  NMR (400 MHz,  $CDCl_3$ )  $\delta$  (ppm): 7.54-7.46 (m, 3H), 7.60-7.53 (m, 1H), 7.75-7.69 (m, 1H), 7.80 (d,  $J$  = 8.2 Hz, 1H), 8.09 (s, 1H), 8.75 (d,  $J$  = 8.4 Hz, 1H)

$^{13}C$  NMR (101 MHz,  $CDCl_3$ )  $\delta$  (ppm): 114.85, 116.43, 123.99, 126.80, 127.22, 127.65, 128.64, 130.17, 131.86, 131.96

IR (film) /  $cm^{-1}$ : 3053, 2985, 2304, 1662, 1421, 1255, 738, 704

HRMS (ESI): calculated for  $C_{10}H_7N_3$   $m/z$  170.0719; found: 170.0716

6. 7-(4-methoxyphenyl)-[1,2,3]triazolo[1,5-a]pyridine (**1g**)

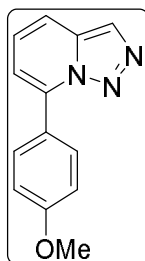

Pale yellow solid (78% overall yield)

$R_f$  = 0.51 (Hexane/Ethyl acetate, 1:1); M.P: 103-105 °C

$^1H$  NMR (400 MHz,  $CDCl_3$ )  $\delta$  (ppm): 3.89 (s, 3H), 7.00-7.02 (m, 1H), 7.06-7.08 (m, 2H), 7.30-7.33 (m, 1H), 7.68 (d,  $J$  = 8.8 Hz, 1H), 7.97-8.00 (m, 2H), 8.14 (s, 1H)

$^{13}C$  NMR (101 MHz,  $CDCl_3$ )  $\delta$  (ppm): 55.44, 114.08, 114.27, 115.85, 124.45, 125.56, 125.88, 128.14, 130.68, 134.79, 138.39, 161.01

IR (film) /  $\text{cm}^{-1}$ : 3053, 2986, 2305, 1422, 1265, 895, 748, 704

HRMS (ESI) calculated for  $\text{C}_{13}\text{H}_{11}\text{N}_3\text{O}$   $m/z$  226.0981, found 226.0981.

7. 7-(4-fluorophenyl)-[1,2,3]triazolo[1,5-a]pyridine (**1h**):

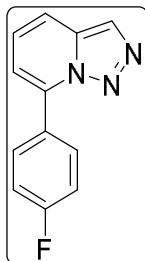

Pale yellow solid (78% overall isolated yield).

R<sub>f</sub>: 0.43 (Hexane/Ethyl acetate, 1:1); M.P: 134-135 °C

$^1\text{H}$  NMR (300 MHz,  $\text{CDCl}_3$ )  $\delta$  (ppm,  $^{19}\text{F}$ -coupled): 7.02 (dd,  $J$  = 6.9 Hz, 1.1 Hz, 1H), 7.19-7.28 (m, 2H), 7.31-7.37 (m, 1H), 7.74 (dd,  $J$  = 8.9 Hz, 1.0 Hz, 1H), 7.99-8.04 (m, 2H), 8.16 (s, 1H)

$^{13}\text{C}$  NMR (75 MHz,  $\text{CDCl}_3$ )  $\delta$  (ppm,  $^{19}\text{F}$ -coupled): 115.01, 115.59, 115.88, 116.69, 125.53, 126.09, 128.13, 128.17, 131.21, 131.32, 134.71, 137.41, 161.96, 165.28

IR (film) /  $\text{cm}^{-1}$ : 3053, 2986, 2304, 1422, 1265, 895, 748, 704

HRMS (ESI) calculated for  $\text{C}_{12}\text{H}_8\text{FN}_3$   $m/z$  214.0781, found 214.0786.

8. 7-(3-nitrophenyl)-[1,2,3]triazolo[1,5-a]pyridine (**1i**)

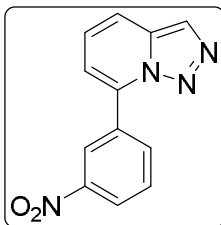

yellow solid (62% overall isolated yield).

R<sub>f</sub>: 0.39 (Hexane/Ethyl acetate, 1:1); M.P: 196-199 °C

$^1\text{H}$  NMR (400 MHz,  $\text{CDCl}_3$ )  $\delta$  (ppm): 7.17 (d,  $J = 6.8$  Hz, 1H), 7.38-7.42 (m, 1H), 7.76 (t,  $J = 8$  Hz, 1H), 7.83 (d,  $J = 8.8$  Hz, 1H), 8.21 (s, 1H), 8.38 (dd,  $J = 8.0$  Hz, 1.2 Hz, 1H), 8.47 (d,  $J = 7.6$  Hz, 1H), 8.83 (s, 1H)

$^{13}\text{C}$  NMR (101 MHz,  $\text{CDCl}_3$ )  $\delta$  (ppm): 115.90, 118.03, 124.22, 124.75, 125.42, 126.48, 129.73, 133.59, 134.70, 135.14, 135.88, 148.49

IR (film) /  $\text{cm}^{-1}$ : 3053, 2986, 2305, 1422, 1265, 895, 741, 706

HRMS (ESI) calculated for  $\text{C}_{12}\text{H}_8\text{N}_4\text{O}_2$   $m/z$  241.0726, found 241.0730.

#### 9. 7-(trifluoromethyl)-[1,2,3]triazolo[1,5-a]pyridine

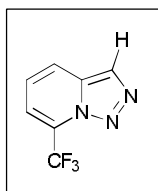

Pale yellow solid (70% overall isolated yield).

$R_f$ : 0.45 (Hexane/Ethyl acetate, 1:1)

$^1\text{H}$  NMR (400 MHz,  $\text{CDCl}_3$ )  $\delta$  (ppm,  $^{19}\text{F}$ -coupled): 7.39-7.31 (m, 1H), 7.46-7.40 (m, 1H), 7.97 (d,  $J = 9.20$  Hz, 1H), 9.23 (s, 1H)

$^{13}\text{C}$  NMR (101 MHz,  $\text{CDCl}_3$ )  $\delta$  (ppm,  $^{19}\text{F}$ -coupled): 115.17, 115.21, 115.26, 118.66, 121.37, 121.92, 123.87, 126.63, 134.45

IR (film) /  $\text{cm}^{-1}$ : 3056, 2956, 2288, 1655, 1422, 1245, 856, 726, 704

HRMS (ESI) calculated for  $\text{C}_7\text{H}_4\text{F}_3\text{N}_3$   $m/z$  188.0436, found 188.0438

## ii. Analytical data for pyridinium triazolinone ylides

### 1. 3-oxo-2-phenyl-2,3-dihydro-[1,2,3]triazolo[1,5-a]pyridine-8-ium-1-ide (**2a**)

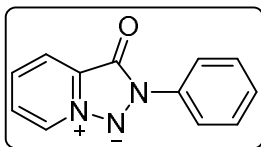

yellow solid

R<sub>f</sub>: 0.27 (Hexane/Ethyl acetate, 1:1), M.P: 175-177 °C

<sup>1</sup>H NMR (400 MHz, CDCl<sub>3</sub>) δ (ppm): 6.86-6.90 (m, 1H), 7.10 (td, *J* = 6.9 Hz, 1.4 Hz, 1H), 7.32-7.36 (m, 1H), 7.46-7.50 (m, 2H), 7.82 (dd, *J* = 8.68 Hz, 1.1 Hz, 1H), 8.11-8.16 (m, 3H).

<sup>13</sup>C NMR (101 MHz, CDCl<sub>3</sub>) δ (ppm): 118.46, 121.09, 122.16, 122.31, 122.48, 122.97, 127.42, 129.15, 136.36, 152.51

IR (film) / cm<sup>-1</sup>: 3053, 2986, 2305, 1647, 1422, 1265, 1142, 895, 748, 704

HRMS (ESI) calculated for C<sub>12</sub>H<sub>9</sub>N<sub>3</sub>O *m/z* 212.0825, found 212.0826.

### 2. 2-(4-chlorophenyl)-3-oxo-2,3-dihydro-[1,2,3]triazolo[1,5-a]pyridine-8-ium-1-ide (**2b**)

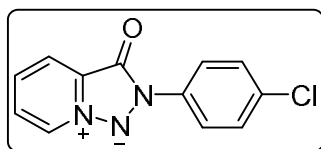

Yellow solid

R<sub>f</sub>: 0.09 (Hexane/Ethyl acetate, 1:1), M.P: 142-145 °C

<sup>1</sup>H NMR (400 MHz, CDCl<sub>3</sub>) δ (ppm): 6.91-6.94 (m, 1H), 7.14-7.18 (m, 1H), 7.46 (d, *J* = 7.8 Hz, 2H), 7.85 (d, *J* = 8.7 Hz, 1H), 8.12-8.18 (m, 3H)

<sup>13</sup>C NMR (101 MHz, CDCl<sub>3</sub>) δ (ppm): 118.77, 122.01, 122.22, 122.56, 122.98, 129.29, 132.88, 134.94, 152.49

IR (film) /  $\text{cm}^{-1}$ : 3053, 2986, 2305, 1647, 1422, 1325, 1265, 895, 746, 706

HRMS (ESI) calculated for  $\text{C}_{12}\text{H}_8\text{ClN}_3\text{O}$   $m/z$  246.0435, found 246.0438.

3. 2-(4-bromophenyl)-3-oxo-2,3-dihydro-[1,2,3]triazolo[1,5-a]pyridine-8-ium-1-ide (**2c**)

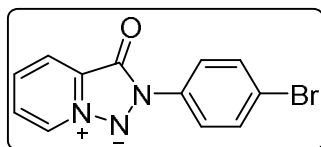

yellow solid

R<sub>f</sub>: 0.09 (Hexane/Ethyl acetate, 1:1), M.P: 174-175 °C

$^1\text{H}$  NMR (400 MHz,  $\text{CDCl}_3$ )  $\delta$  (ppm): 6.92-6.96 (m, 1H), 7.17, (td,  $J = 7.0$  Hz, 1.4 Hz, 1H), 7.60-7.64 (m, 2H), 7.85 (dt,  $J = 8.7$  Hz, 1.1 Hz, 1H), 8.11-8.13 (m, 3H)

$^{13}\text{C}$  NMR (101 MHz,  $\text{CDCl}_3$ )  $\delta$  (ppm): 118.74, 120.82, 122.25, 122.58, 122.97, 123.16, 132.26, 135.49, 152.50

IR (film) /  $\text{cm}^{-1}$ : 3422, 3053, 2986, 2305, 1647, 1422, 1325, 1265, 1142, 895, 746, 704

HRMS (ESI) calculated for  $\text{C}_{12}\text{H}_8\text{BrN}_3\text{O}$   $m/z$  289.9930, found 289.9934.

4. 2-(4-fluorophenyl)-3-oxo-2,3-dihydro-[1,2,3]triazolo[1,5-a]pyridine-8-ium-1-ide (**2d**)

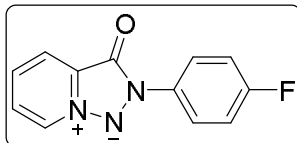

yellow solid

R<sub>f</sub>: 0.09 (Hexane/Ethyl acetate, 1:1), M.P: 178-180 °C

$^1\text{H}$  NMR (400 MHz,  $\text{CDCl}_3$ )  $\delta$  (ppm,  $^{19}\text{F}$ -coupled): 6.91-6.95 (m, 1H), 7.13-7.21 (m, 3H), 7.86 (d,  $J = 8.0$  Hz, 1H), 8.13-8.18 (m, 3H)

$^{13}\text{C}$  NMR (101 MHz,  $\text{CDCl}_3$ )  $\delta$  (ppm,  $^{19}\text{F}$ -coupled): 115.91, 116.13, 118.64, 122.22, 122.37, 122.48, 122.91, 122.96, 122.99, 132.50, 132.53, 152.38, 160.25, 162.71



IR (film) /  $\text{cm}^{-1}$ : 3050, 2998, 2305, 1625 1422, 1325, 1345, 1265, 1142, 746, 704

HRMS (ESI) calculated for  $\text{C}_{12}\text{H}_8\text{FN}_3\text{O}$   $m/z$  230.0730, found 230.0730.

5. 3-oxo-2-(p-tolyl)-2,3-dihydro-[1,2,3]triazolo[1,5-a]pyridine-8-ium-1-ide (**2f**)

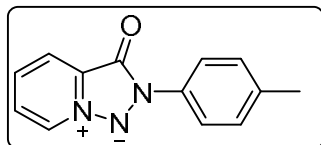

yellow solid

R<sub>f</sub>: 0.10 (Hexane/Ethyl acetate, 1:1), M.P: 160-164 °C

$^1\text{H}$  NMR (400 MHz,  $\text{CDCl}_3$ )  $\delta$  (ppm): 2.40 (s, 3H), 6.88-6.92 (m, 1H), 7.13 (td,  $J$  = 6.9 Hz, 1.2 Hz, 1H), 7.31 (d,  $J$  = 8.4 Hz, 2H), 7.85 (d,  $J$  = 8.7 Hz, 1H), 8.03 (d,  $J$  = 8.5 Hz, 2H), 8.13 (d,  $J$  = 7 Hz, 1H)

$^{13}\text{C}$  NMR (101 MHz,  $\text{CDCl}_3$ )  $\delta$  (ppm): 21.14, 118.30, 121.11, 122.09, 122.18, 122.44, 122.93, 129.70, 133.92, 137.41, 152.41

IR (film) /  $\text{cm}^{-1}$ : 3429, 3422, 3412, 3053, 2986, 2305, 1647, 1510, 1422, 1325, 1265, 1142, 895, 741, 704, 507

HRMS (ESI) calculated for  $\text{C}_{13}\text{H}_{11}\text{N}_3\text{O}$   $m/z$  226.0981, found 226.0986.

6. 2-(6-(tert-butyl)pyridin-3-yl)-3-oxo-2,3-dihydro-[1,2,3]triazolo[1,5-a]pyridin-8-ium-1-ide (**2g**)

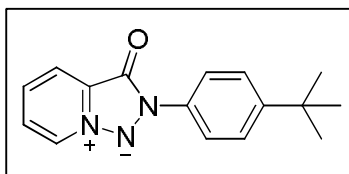

yellow solid

R<sub>f</sub>: 0.13 (Hexane/Ethyl acetate, 1:1), M.P: 200-203 °C

$^1\text{H}$  NMR (400 MHz,  $\text{CDCl}_3$ )  $\delta$  (ppm): 1.36 (s, 9H), 6.92-8.87 (m, 1H), 7.12 (dt,  $J = 7.0, 1.5\text{Hz}$ , 1H), 7.52 (d,  $J = 8.6\text{Hz}$ , 2H), 7.85 (d,  $J = 8.7\text{Hz}$ , 1H), 8.06-8.01 (m, 2H), 8.13 (d,  $J = 7.6\text{Hz}$ , 1H)

$^{13}\text{C}$  NMR (101 MHz,  $\text{CDCl}_3$ )  $\delta$  (ppm): 31.30, 34.71, 118.3, 121.0, 122.0, 122.1, 122.3, 122.9, 126.0, 133.7, 150.6, 152.4

IR (film) /  $\text{cm}^{-1}$ : 3053, 2966, 2348, 1658, 1514, 1371, 1319, 1270, 1141, 728, 704

HRMS (ESI) calculated for  $\text{C}_{16}\text{H}_{17}\text{N}_3\text{O}$   $m/z$  268.1451, found 268.1448

7. 2-([1,1'-biphenyl]-4-yl)-3-oxo-2,3-dihydro-[1,2,3]triazolo[1,5-a]pyridin-8-ium-1-ide (**2h**)

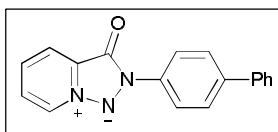

yellow solid

$R_f$ : 0.12 (Hexane/Ethyl acetate, 1:1), M.P: 154-157  $^{\circ}\text{C}$

$^1\text{H}$  NMR (400 MHz,  $\text{CDCl}_3$ )  $\delta$  (ppm): 6.92 (t,  $J = 8.0\text{ Hz}$ , 1H), 7.15 (t,  $J = 7.2\text{ Hz}$ , 1H), 7.40-7.34 (m, 1H), 7.46 (t,  $J = 8.0\text{ Hz}$ , 2H), 7.66-7.61 (m, 2H), 7.38 (d,  $J = 8.4\text{ Hz}$ , 2H), 7.87 (d,  $J = 8.9\text{ Hz}$ , 1H), 8.16 (d,  $J = 7.4\text{ Hz}$ , 1H), 8.26 (d,  $J = 8.6\text{ Hz}$ , 2H)

$^{13}\text{C}$  NMR (101 MHz,  $\text{CDCl}_3$ )  $\delta$  (ppm): 118.69, 121.45, 122.40, 122.50, 122.69, 123.16, 127.25, 127.76, 127.97, 129.04, 135.70, 140.39, 152.74

IR (film) /  $\text{cm}^{-1}$ : 3053, 2985, 1658, 1421, 1280, 894, 720, 695

HRMS (ESI) calculated for  $\text{C}_{18}\text{H}_{13}\text{N}_3\text{O}$   $m/z$  288.1138, found 288.1134

8. 2-(4-methoxyphenyl)-3-oxo-2,3-dihydro-[1,2,3]triazolo[1,5-a]pyridin-8-ium-1-ide (**2i**)

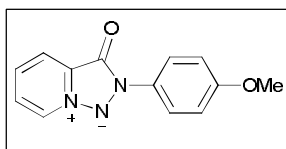

yellow solid

R<sub>f</sub>: 0.14 (Hexane/Ethyl acetate, 1:1), M.P: 174-177 °C

<sup>1</sup>H NMR (400 MHz, CDCl<sub>3</sub>) δ (ppm): 3.86 (s, 3H), 6.94-6.88 (m, 1H), 7.02 (d, *J* = 9.0 Hz, 2H), 7.12 (t, *J* = 7.0 Hz, 1H), 7.85 (d, *J* = 8.9 Hz, 1H), 8.04 (d, *J* = 9.0 Hz, 2H), 8.13 (d, *J* = 7.4 Hz, 1H)

<sup>13</sup>C NMR (101 MHz, CDCl<sub>3</sub>) δ (ppm): 55.73, 114.53, 118.61, 121.97, 122.15, 122.30, 123.10, 129.66, 159.01

IR (film) / cm<sup>-1</sup>: 3025, 2985, 1670, 1410, 1265, 984, 725, 705

HRMS (ESI) calculated for C<sub>13</sub>H<sub>11</sub>N<sub>3</sub>O<sub>2</sub> m/z 242.0930, found 242.088

9. 2-(4-nitrophenyl)-3-oxo-2,3-dihydro-[1,2,3]triazolo[1,5-a]pyridin-8-ium-1-ide (**2j**)

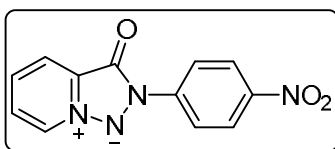

yellow solid

R<sub>f</sub>: 0.08 (Hexane/Ethyl acetate, 1:1), M.P: 223-225 °C

<sup>1</sup>H NMR (400 MHz, CDCl<sub>3</sub>) δ (ppm): 6.97-7.01 (m, 1H), 7.23-7.26 (m, 1H), 7.89 (d, *J* = 8.7 Hz, 1H), 8.17 (d, *J* = 7.0 Hz, 1H), 8.37 (d, *J* = 9.2 Hz, 2H), 8.53 (d, *J* = 9.2 Hz, 2H)

<sup>13</sup>C NMR (101 MHz, CDCl<sub>3</sub>) δ (ppm): 119.29, 120.26, 122.50, 123.03, 123.46, 123.66, 124.87, 141.30, 145.80, 153.14

IR (film) / cm<sup>-1</sup>: 3422, 3053, 2986, 2305, 1647, 1422, 1325, 1265, 1142, 895, 743, 706

HRMS (ESI) calculated for C<sub>12</sub>H<sub>8</sub>N<sub>4</sub>O<sub>3</sub> m/z 257.0675, found 257.0675.

10.3-oxo-2-(4-(trifluoromethyl)phenyl)-2,3-dihydro-[1,2,3]triazolo[1,5-a]pyridin-8-ium-1-ide  
(**2k**)

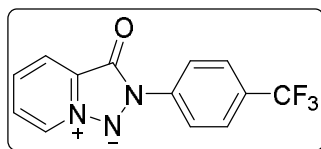

yellow solid

R<sub>f</sub>: 0.13 (Hexane/Ethyl acetate, 1:1), M.P. 195-198 °C

<sup>1</sup>H NMR (400 MHz, CDCl<sub>3</sub>) δ (ppm, <sup>19</sup>F-coupled): 6.94-6.97 (m, 1H), 7.20 (td, *J* = 7.0 Hz, 1.4 Hz, 1H), 7.76 (d, *J* = 8.6 Hz, 2H), 7.87 (d, *J* = 8.6 Hz, 1H), 8.16 (d, *J* = 7.0 Hz, 1H), 8.40 (d, *J* = 8.5 Hz, 2H)

<sup>13</sup>C NMR (101 MHz, CDCl<sub>3</sub>) δ (ppm, <sup>19</sup>F-coupled): 118.87, 120.46, 122.35, 122.54, 122.69, 122.93, 122.99, 125.24, 126.29, 126.33, 126.37, 126.40, 128.81, 129.13, 139.18, 152.85

IR (film) / cm<sup>-1</sup>: 3053, 2986, 2305, 1647, 1422, 1325, 1265, 1142, 895, 750, 704

HRMS (ESI) calculated for C<sub>13</sub>H<sub>8</sub>F<sub>3</sub>N<sub>3</sub>O m/z 280.0698, found 280.0692.

11. 2-(3-(methoxycarbonyl)phenyl)-3-oxo-2,3-dihydro-[1,2,3]triazolo[1,5-a]pyridin-8-ium-1-ide  
(**2m**)

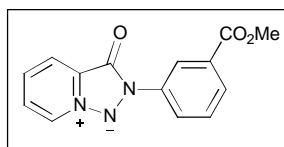

yellow solid

R<sub>f</sub>: 0.12 (Hexane/Ethyl acetate, 1:1), M.P: 200-203 °C

<sup>1</sup>H NMR (400 MHz, CDCl<sub>3</sub>) δ (ppm): 8.77-8.72 (m, 1H), 8.54-8.49 (m, 1H), 8.16 (d, *J* = 7.2 Hz, 1H), 8.03 (d, *J* = 7.6 Hz, 1H), 7.86 (d, *J* = 8.6 Hz, 1H), 7.58 (t, *J* = 8.0 Hz, 1H), 7.17 (dt, *J* = 7.1, 1.5 Hz, 1H), 6.96-6.90 (m, 1H), 3.95 (s, 3H)

$^{13}\text{C}$  NMR (101 MHz,  $\text{CDCl}_3$ )  $\delta$  (ppm): 52.36, 118.74, 121.82, 122.21, 122.55, 122.62, 123.02, 125.13, 128.32, 129.33, 131.37, 136.57, 152.63, 166.34

IR (film) /  $\text{cm}^{-1}$ : 3053, 2985, 2409, 1722, 1666, 1421, 1230, 894, 723, 704

HRMS (ESI) calculated for  $\text{C}_{14}\text{H}_{11}\text{N}_3\text{O}_3$   $m/z$  270.0879, found 270.0880

12.2-(6-chloropyridin-3-yl)-3-oxo-2,3-dihydro-[1,2,3]triazolo[1,5-a]pyridin-8-ium-1-ide (**2n**)

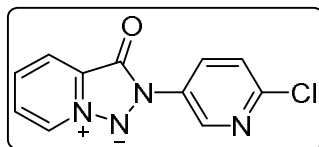

brown solid

R<sub>f</sub>: 0.09 (Hexane/Ethyl acetate, 1:1), M.P: 154-156 °C

$^1\text{H}$  NMR (400 MHz,  $\text{CDCl}_3$ )  $\delta$  (ppm): 6.97-7.00 (m, 1H), 7.22 (td,  $J = 7.0$  Hz, 1.4 Hz, 1H), 7.47 (d,  $J = 8.6$  Hz, 1H), 7.86-7.88 (m, 1H), 8.18 (d,  $J = 7.1$  Hz, 1H), 8.70 (dd,  $J = 8.8$  Hz, 2.8 Hz, 1H), 9.20 (s, 1H)

$^{13}\text{C}$  NMR (101 MHz,  $\text{CDCl}_3$ )  $\delta$  (ppm): 119.22, 122.29, 123.07, 124.38, 130.20, 132.37, 141.48, 149.18, 152.94

IR (film) /  $\text{cm}^{-1}$ : 3422, 3420, 3053, 2986, 2305, 1647, 1422, 1325, 1265, 1142, 895, 748, 704, 503

HRMS (ESI) calculated for  $\text{C}_{11}\text{H}_7\text{ClN}_4\text{O}$   $m/z$  247.0387, found 247.0387.

13. 7-methyl-3-oxo-2-phenyl-2,3-dihydro-[1,2,3]triazolo[1,5-a]pyridin-8-ium-1-ide (**2o**)

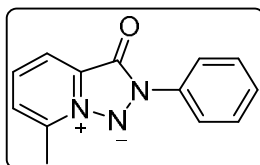

yellow solid

R<sub>f</sub>: 0.13 (Hexane/Ethyl acetate, 1:1), M.P: 166-168 °C

$^1\text{H}$  NMR (400 MHz,  $\text{CDCl}_3$ )  $\delta$  (ppm): 2.64 (s, 3H), 6.89-6.94 (m, 1H), 7.01 (d,  $J = 6.9$  Hz, 1H), 7.33-7.37 (m, 1H), 7.48-7.53 (m, 2H), 7.80 (d,  $J = 8.5$  Hz, 1H), 8.21-8.23 (m, 2H).

$^{13}\text{C}$  NMR (101 MHz,  $\text{CDCl}_3$ )  $\delta$  (ppm): 16.17, 118.79, 119.60, 121.12, 121.19, 122.81, 127.29, 129.11, 132.92, 136.66, 153.02

IR (film) /  $\text{cm}^{-1}$ : 3053, 2986, 2305, 1647, 1422, 1265, 1142, 895, 741, 706

HRMS (ESI) calculated for  $\text{C}_{13}\text{H}_{11}\text{N}_3\text{O}$   $m/z$  226.0981, found 226.0985.

14. 4-methyl-3-oxo-2-phenyl-2,3-dihydro-[1,2,3]triazolo[1,5-a]pyridin-8-ium-1-ide (**2p**)

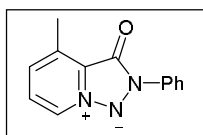

yellow solid

$R_f$ : 0.14 (Hexane/Ethyl acetate, 1:1), M.P: 158-161  $^{\circ}\text{C}$

$^1\text{H}$  NMR (400 MHz,  $\text{CDCl}_3$ )  $\delta$  (ppm): 2.75 (s, 3H), 6.60 (d,  $J = 7.5$  Hz, 1H), 7.00 (t,  $J = 7.4$  Hz, 1H), 7.37-7.32 (m, 1H), 7.52-7.46 (m, 2H), 7.98 (d,  $J = 7.4$  Hz, 1H), 8.16 (dd,  $J = 8.8, 1.3$  Hz, 2H)

$^{13}\text{C}$  NMR (101 MHz,  $\text{CDCl}_3$ )  $\delta$  (ppm): 16.52, 118.74, 120.80, 121.14, 121.65, 122.21, 127.42, 129.26, 136.51, 135.60, 153.41

IR (film) /  $\text{cm}^{-1}$ : 3180, 3155, 1654, 1494, 1313, 1285, 1130, 710, 704

HRMS (ESI) calculated for  $\text{C}_{13}\text{H}_{11}\text{N}_3\text{O}$   $m/z$  226.0981, found 226.0981

15. 6-chloro-3-oxo-2-phenyl-2,3-dihydro-[1,2,3]triazolo[1,5-a]pyridin-8-ium-1-ide (**2q**)

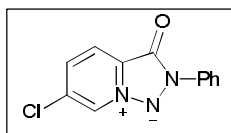

yellow solid

$R_f$ : 0.16 (Hexane/Ethyl acetate, 1:1), M.P: 145-148  $^{\circ}\text{C}$

$^1\text{H}$  NMR (400 MHz,  $\text{CDCl}_3$ )  $\delta$  (ppm): 6.86 (dd,  $J = 6.8, 1.7$  Hz, 1H), 7.40-7.33 (m, 1H), 7.54-7.46 (m, 2H), 7.79 (d,  $J = 9.3$  Hz, 1H), 8.12 (d,  $J = 8.9$  Hz, 2H), 8.18 (s, 1H)

$^{13}\text{C}$  NMR (101 MHz,  $\text{CDCl}_3$ )  $\delta$  (ppm): 120.16, 121.11, 121.15, 121.18, 122.61, 127.82, 129.39, 131.62, 136.26, 152.46

IR (film) /  $\text{cm}^{-1}$ : 3145, 3098, 2310, 1668, 1421, 1234, 894, 789, 752

HRMS (ESI) calculated for  $\text{C}_{12}\text{H}_8\text{ClN}_3\text{O}$   $m/z$  246.0435, found 246.0429

16. 6-bromo-3-oxo-2-phenyl-2,3-dihydro-[1,2,3]triazolo[1,5-a]pyridin-8-ium-1-ide (**2r**)

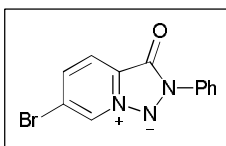

yellow solid

$R_f$ : 0.17 (Hexane/Ethyl acetate, 1:1), M.P: 141-145  $^{\circ}\text{C}$

$^1\text{H}$  NMR (400 MHz,  $\text{CDCl}_3$ )  $\delta$  (ppm): 6.97 (dd,  $J = 9.2, 1.6$  Hz, 1H), 7.40-7.39 (m, 1H), 7.54-7.46 (m, 2H), 7.72 (d,  $J = 9.4$  Hz, 1H), 8.12 (dd,  $J = 8.9, 1.3$  Hz, 2H), 8.30 (s, 1H)

$^{13}\text{C}$  NMR (101 MHz,  $\text{CDCl}_3$ )  $\delta$  (ppm): 118.78, 119.98, 121.22, 122.31, 122.63, 123.19, 124.38, 127.85, 129.14, 129.40, 136.22, 152.52

IR (film) /  $\text{cm}^{-1}$ : 3112, 3075, 2388, 1650, 1480, 1320, 1246, 910, 770, 715

HRMS (ESI) calculated for  $\text{C}_{12}\text{H}_8\text{BrN}_3\text{O}$   $m/z$  289.9930, found 289.9932

17. 3-oxo-2-phenyl-2,3-dihydro-[1,2,3]triazolo[1,5-a]quinolin-10-ium-1-ide (**2s**)

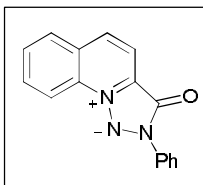

yellow solid

$R_f$ : 0.13 (Hexane/Ethyl acetate, 1:1), M.P: 150-155  $^{\circ}\text{C}$

$^1\text{H}$  NMR (400 MHz,  $\text{CDCl}_3$ )  $\delta$  (ppm): 7.29-7.22 (m, 1H), 7.44-7.39 (m, 1H), 7.59-7.52 (m, 2H), 7.74-7.63 (m, 3H), 7.84-7.78 (m, 1H), 8.27 (d,  $J = 8.9$  Hz, 2H), 8.53 (d,  $J = 8.9$  Hz, 1H)

$^{13}\text{C}$  NMR (101 MHz,  $\text{CDCl}_3$ )  $\delta$  (ppm): 116.08, 117.36, 118.97, 119.91, 121.50, 127.80, 127.99, 128.92, 129.20, 129.36, 129.44, 130.54, 136.69, 153.58

IR (film) /  $\text{cm}^{-1}$ : 3834, 3695, 3053, 2304, 2985, 1660, 1230, 894, 780, 705

HRMS (ESI) calculated for  $\text{C}_{16}\text{H}_{11}\text{N}_3\text{O}$   $m/z$  262.0981, found 262.0986

18. 7-(4-methoxyphenyl)-3-oxo-2-phenyl-2,3-dihydro-[1,2,3]triazolo[1,5-a]pyridin-8-ium-1-ide (**2t**)

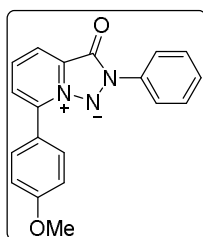

yellow solid

R<sub>f</sub>: 0.15 (Hexane/Ethyl acetate, 1:1), M.P: 172-174 °C

$^1\text{H}$  NMR (400 MHz,  $\text{CDCl}_3$ )  $\delta$  (ppm): 3.91 (s, 3H), 7.01-7.08 (m, 3H), 7.20 (dd,  $J = 7.2$  Hz, 1.2 Hz, 1H), 7.32-7.36 (m, 1H), 7.46-7.50 (m, 2H), 7.85 (dd,  $J = 8.6, 1.2$  Hz, 1H), 7.89-7.91 (m, 2H), 8.18 (d,  $J = 7.6$  Hz, 2H)

$^{13}\text{C}$  NMR (101 MHz,  $\text{CDCl}_3$ )  $\delta$  (ppm): 55.43, 114.12, 119.26, 120.23, 121.14, 121.78, 123.19, 123.67, 127.28, 129.07, 130.25, 135.07, 136.59, 152.77, 161.00

IR (film) /  $\text{cm}^{-1}$ : 3422, 3053, 2986, 2305, 1647, 1422, 1325, 1265, 1142, 895, 748, 704

HRMS (ESI) calculated for  $\text{C}_{19}\text{H}_{15}\text{N}_3\text{O}_2$   $m/z$  318.1243, found 318.1240.



19. 7-(4-fluorophenyl)-3-oxo-2-phenyl-2,3-dihydro-[1,2,3]triazolo[1,5-a]pyridin-8-ium-1-ide  
(**2u**)

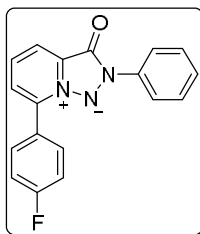

yellow solid

R<sub>f</sub>: 0.11 (Hexane/Ethyl acetate, 1:1), M.P: 156-159 °C

<sup>1</sup>H NMR (400 MHz, CDCl<sub>3</sub>) δ (ppm, <sup>19</sup>F coupled): 7.03-7.06 (m, 1H), 7.20-7.27 (m, 3H), 7.33-7.36 (m, 1H), 7.47-7.51 (m, 2H), 7.90-7.95 (m, 3H), 8.15-8.17 (m, 2H)

<sup>13</sup>C NMR (101 MHz, CDCl<sub>3</sub>) δ (ppm, <sup>19</sup>F coupled): 115.82, 116.04, 119.17, 121.04, 121.11, 122.47, 123.69, 126.97, 127.00, 127.43, 129.14, 130.85, 130.93, 134.19, 136.46, 152.74, 162.36, 164.86

IR (film) / cm<sup>-1</sup>: 3447, 3429, 3422, 3412, 3053, 2986, 2305, 1647, 1422, 1325, 1265, 1142, 895, 743, 706

HRMS (ESI) calculated for C<sub>18</sub>H<sub>12</sub>FN<sub>3</sub>O m/z 306.1043, found 306.1040.

20. 7-(3-nitrophenyl)-3-oxo-2-phenyl-2,3-dihydro-[1,2,3]triazolo[1,5-a]pyridin-8-ium-1-ide (**2v**)

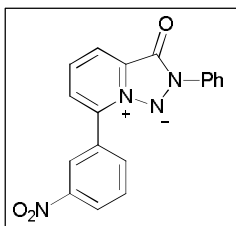

Yellow-brown solid

R<sub>f</sub>: 0.12 (Hexane/Ethyl acetate, 1:1), M.P: 198-202 °C

$^1\text{H}$  NMR (400 MHz,  $\text{CDCl}_3$ )  $\delta$  (ppm): 7.13-7.06 (m, 1H), 7.39-7.32 (m, 2H), 7.50 (t,  $J = 8.2$  Hz, 2H), 7.76 (d,  $J = 8.1$  Hz, 1H), 7.97 (dd,  $J = 8.6, 1.6$  Hz, 1H), 8.15 (d,  $J = 8.6$  Hz, 2H), 8.3 (d,  $J = 8.3$  Hz, 1H), 8.39 (d,  $J = 8.3$  Hz, 1H), 8.90-8.87 (m, 1H)

$^{13}\text{C}$  NMR (101 MHz,  $\text{CDCl}_3$ )  $\delta$  (ppm): 119.05, 121.03, 122.32, 123.33, 123.83, 123.90, 124.85, 127.62, 129.23, 129.87, 132.40, 134.42, 136.23, 148.47, 152.60

IR (film) /  $\text{cm}^{-1}$ : 3112, 2924, 2310, 1685, 1411, 1255, 918, 728, 705

HRMS (ESI) calculated for  $\text{C}_{18}\text{H}_{12}\text{N}_4\text{O}_3$   $m/z$  333.0988, found 333.0988

21. 3-oxo-2,7-diphenyl-2,3-dihydro-[1,2,3]triazolo[1,5-a]pyridin-8-ium-1-ide (**3a**)

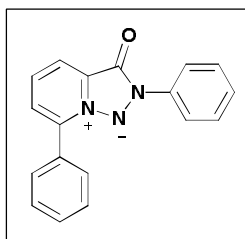

yellow solid

$R_f$ : 0.11 (Hexane/Ethyl acetate, 1:1); M.P: 140-143  $^{\circ}\text{C}$

$^1\text{H}$  NMR (400 MHz,  $\text{CDCl}_3$ )  $\delta$  (ppm): 7.09-7.03 (m, 1H), 7.27-7.24 (m, 1H), 7.38-7.33 (m, 1H), 7.50 (t,  $J = 8.2$  Hz, 2H), 7.61-7.54 (m, 3H), 7.90 (d,  $J = 8.8$  Hz, 1H), 7.97-7.93 (m, 2H), 8.19 (d,  $J = 8.8$  Hz, 2H)

$^{13}\text{C}$  NMR (101 MHz,  $\text{CDCl}_3$ )  $\delta$  (ppm): 119.19, 121.12, 122.55, 127.33, 128.70, 128.75, 129.07, 130.22, 130.91, 132.03, 132.16, 135.15, 136.50, 152.73

IR (film) /  $\text{cm}^{-1}$ : 3053, 2985, 2388, 1658, 1436, 1421, 1288, 1178, 1120, 894, 770, 710

HRMS (ESI) calculated for  $\text{C}_{18}\text{H}_{13}\text{N}_3\text{O}$   $m/z$  288.1138, found 288.1142

22. 7-methyl-3-(oxo-<sup>18</sup>O)-2-phenyl-2,3-dihydro-[1,2,3]triazolo[1,5-a]pyridin-8-ium-1-ide (**2i'**)

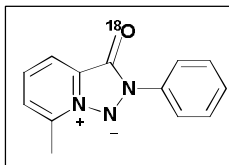

yellow solid

R<sub>f</sub>: 0.13 (Hexane/Ethyl acetate, 1:1), M.P: 166-168 °C

<sup>1</sup>H NMR (400 MHz, CDCl<sub>3</sub>) δ (ppm): 2.63 (s, 3H), 6.94-6.89 (m, 1H), 7.02-6.98 (m, 1H), 7.37-7.36-7.35 (m, 1H), 7.51 (t, *J* = 7.88 Hz, 2H), 7.79 (d, *J* = 8.6 Hz, 1H), 8.22 (d, *J* = 8.6 Hz, 2H)

<sup>13</sup>C NMR (101 MHz, CDCl<sub>3</sub>) δ (ppm): 16.34, 118.98, 119.79, 121.29, 121.35, 122.94, 127.45, 129.27, 133.08, 136.78, 153.13

IR (film) / cm<sup>-1</sup>: 3043, 2981, 2305, 1689, 1426, 1265, 1134, 898, 741, 706

HRMS (ESI) calculated for C<sub>13</sub>H<sub>11</sub>N<sub>3</sub><sup>18</sup>O m/z 228.1024, found 228.1024

23. 7-methyl-3-oxo-2-phenyl-2,3,4,5,6,7-hexahydro-[1,2,3]triazolo[1,5-a]pyridin-8-ium-1-ide (**4**)

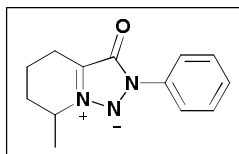

Pale white solid

R<sub>f</sub>: 0.21 (Hexane/Ethyl acetate, 1:1), M.P: 103-104 °C

<sup>1</sup>H NMR (400 MHz, CDCl<sub>3</sub>) δ (ppm): 1.68 (d, *J* = 6.8 Hz, 3H), 1.89-1.78 (m, 2H), 2.11-2.00 (m, 1H), 2.31-2.16 (m, 1H), 2.76-2.63 (m, 1H), 2.90-2.79 (m, 1H), 4.43-4.31 (m, 1H), 7.37-7.30 (m, 1H), 7.47 (t, *J* = 8.4 Hz, 2H), 8.08 (d, *J* = 8.5 Hz, 2H)

<sup>13</sup>C NMR (101 MHz, CDCl<sub>3</sub>) δ (ppm): 18.03, 19.99, 20.17, 30.71, 55.53, 116.56, 121.13, 127.41, 129.13, 136.74, 155.75

HRMS (ESI) calculated for C<sub>13</sub>H<sub>15</sub>N<sub>3</sub>O m/z 230.1294, found 230.1296

### iii. X-ray crystal structures of 2a and 3a

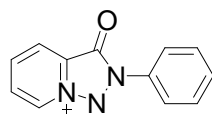

**2a**

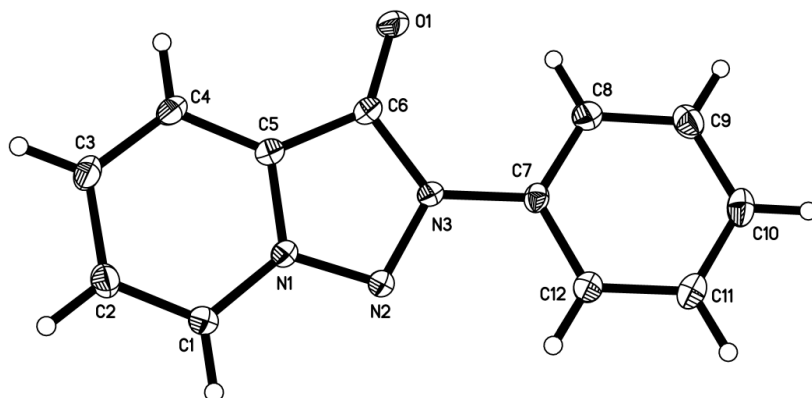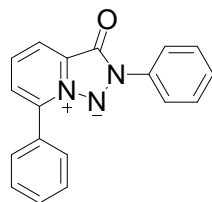

**3a**

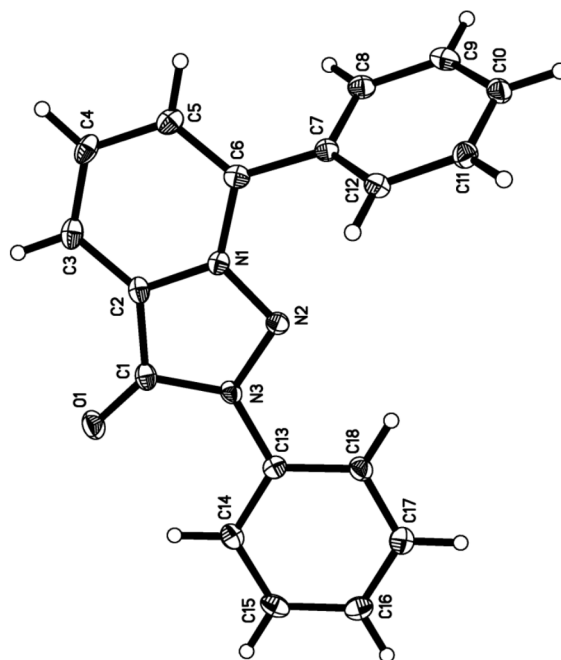

## IV. Spectral images

1.

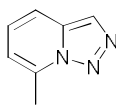

ZG-54, after column

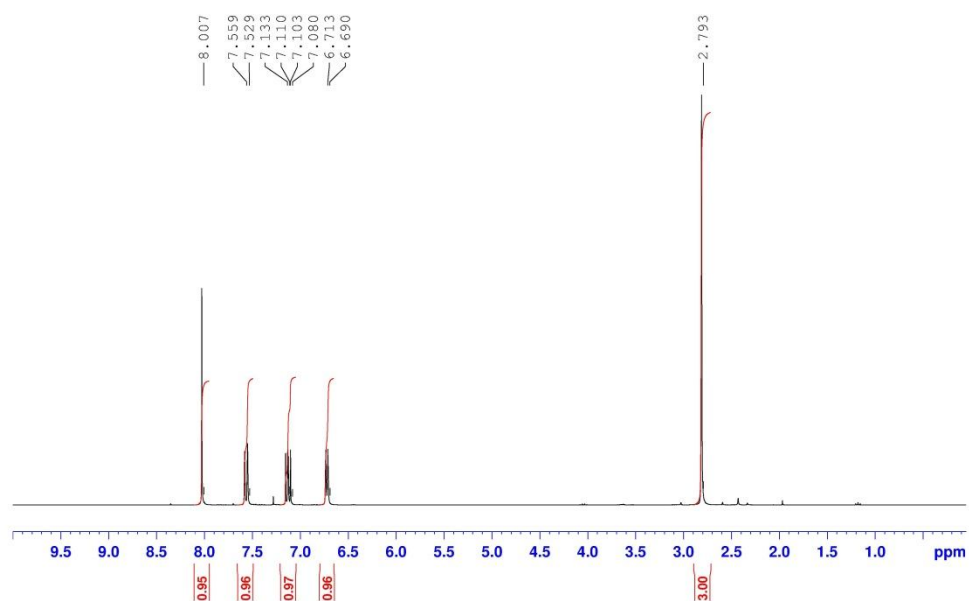

ZG-54, after column

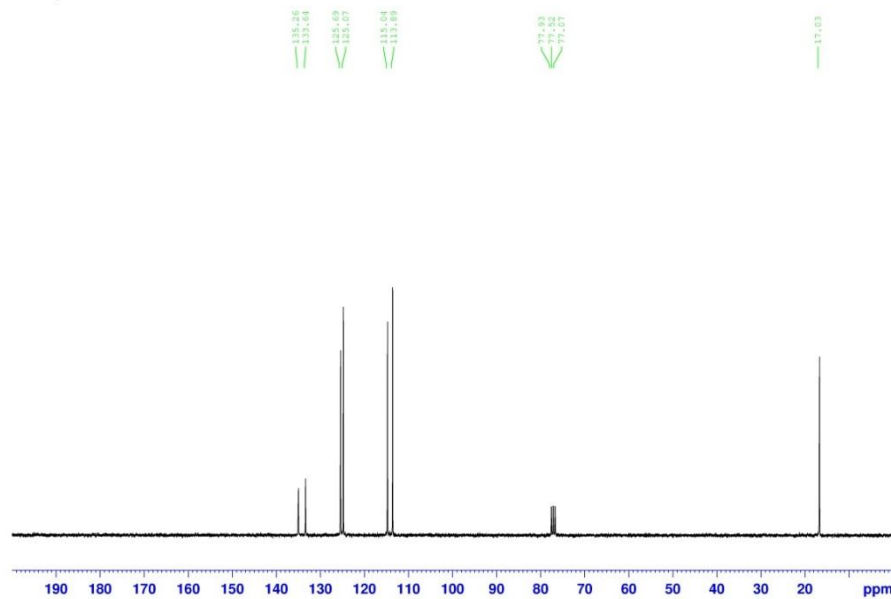

2.

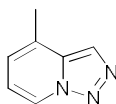

SZG70b, methyl substituted triazole

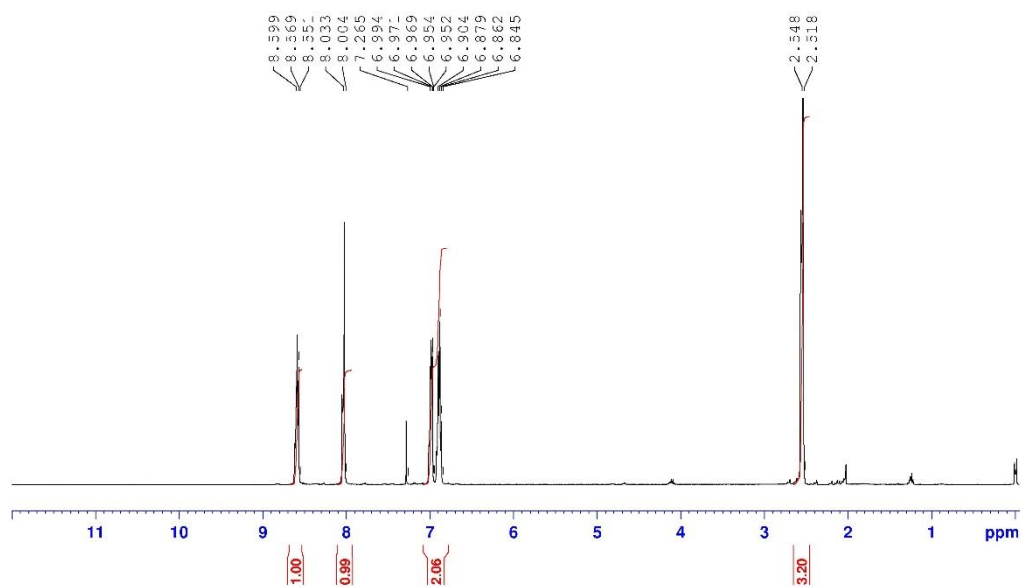

SZG-70B, methyl substituted triazole

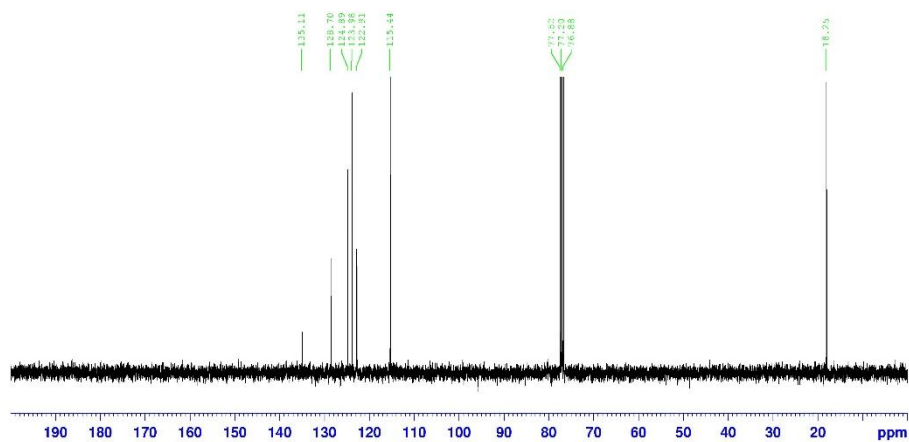

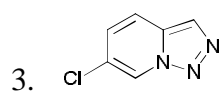

S7G-38

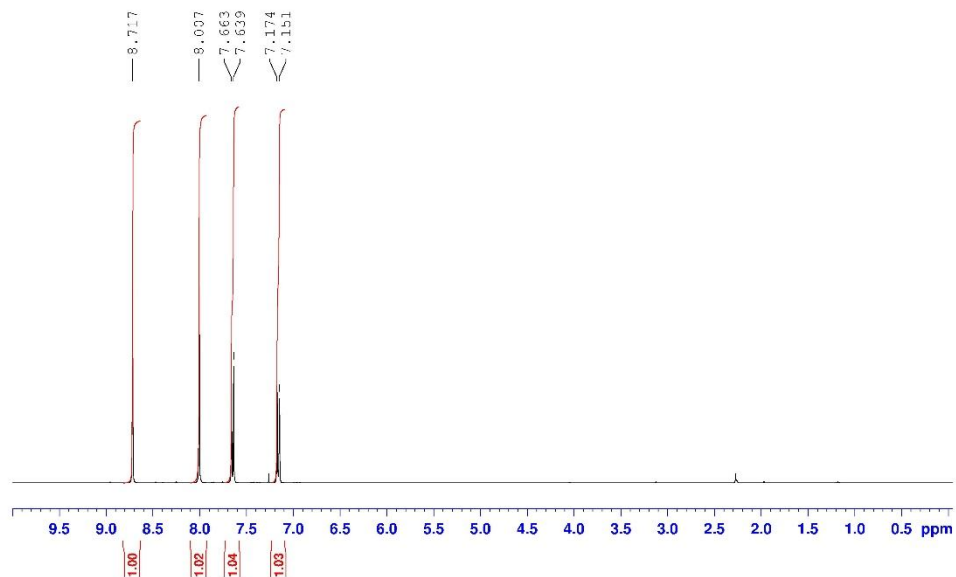

S7G-38

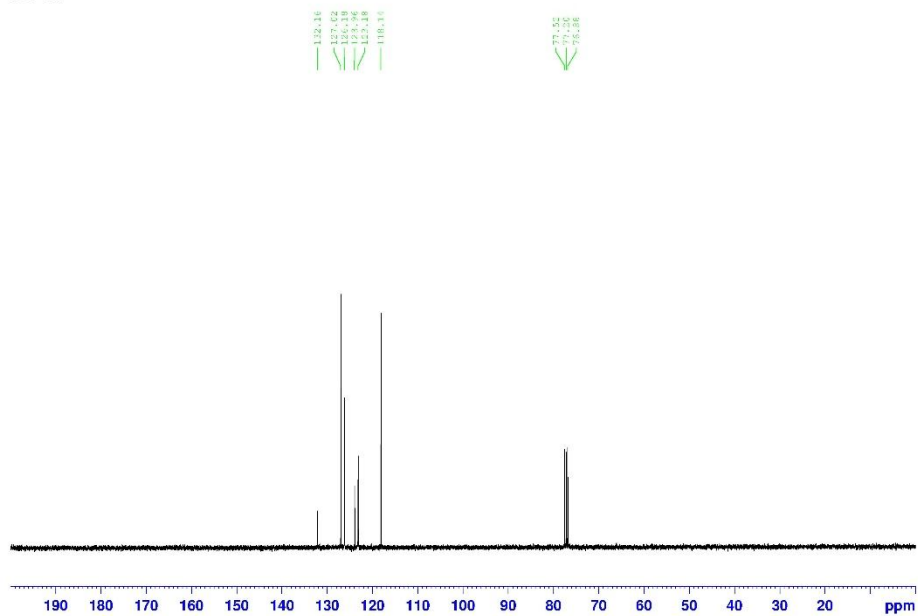

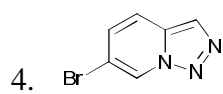

SZG70c, Br substituted triazole

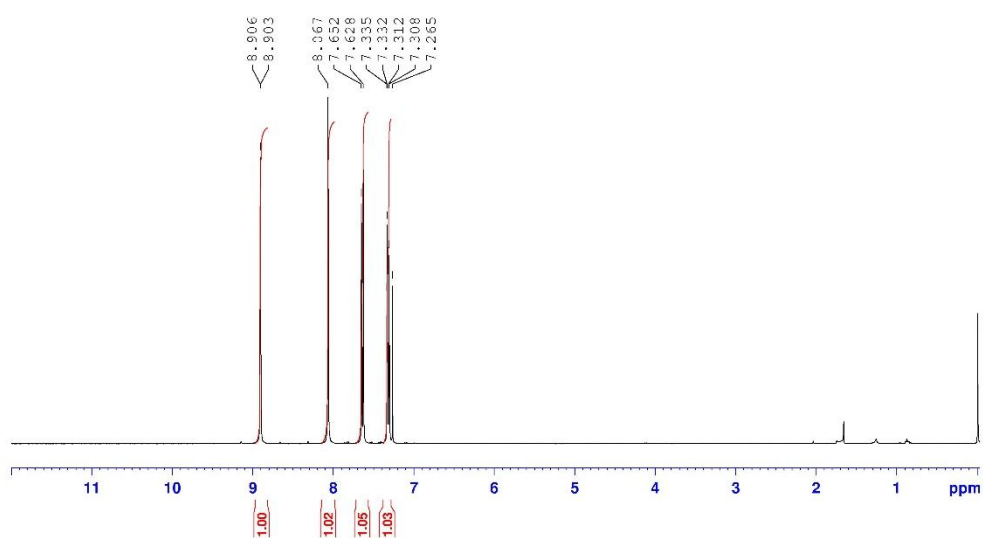

SZG-70C, Br substituted triazole

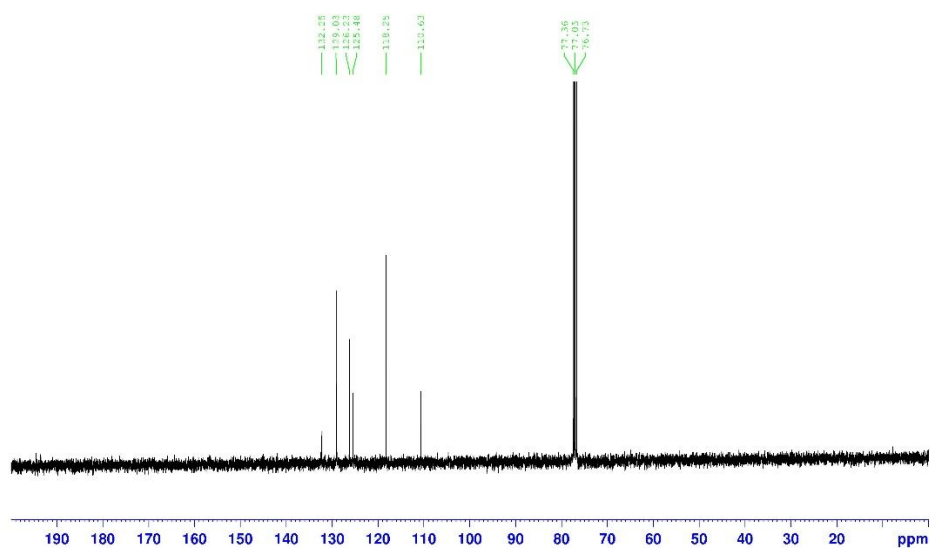



5.

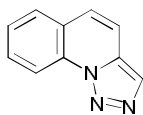

SZG-25

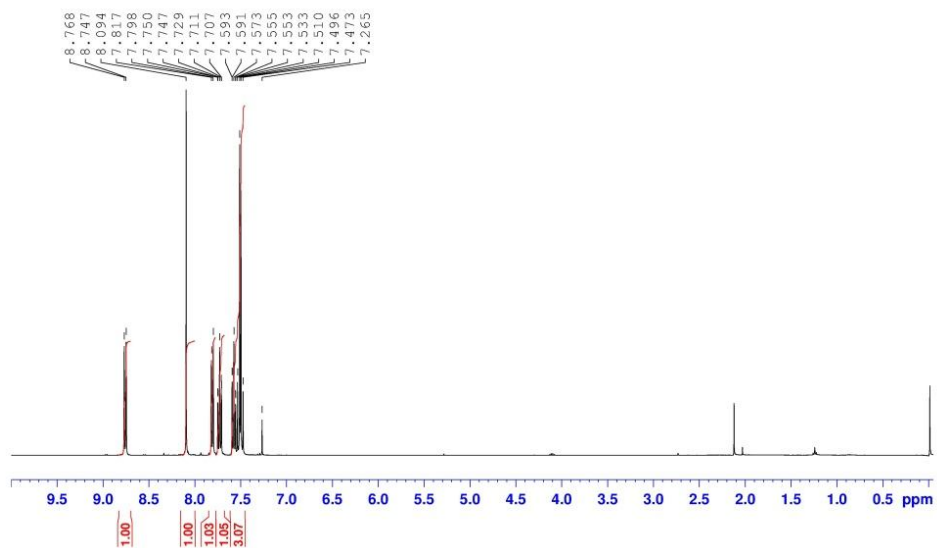

SZG-25

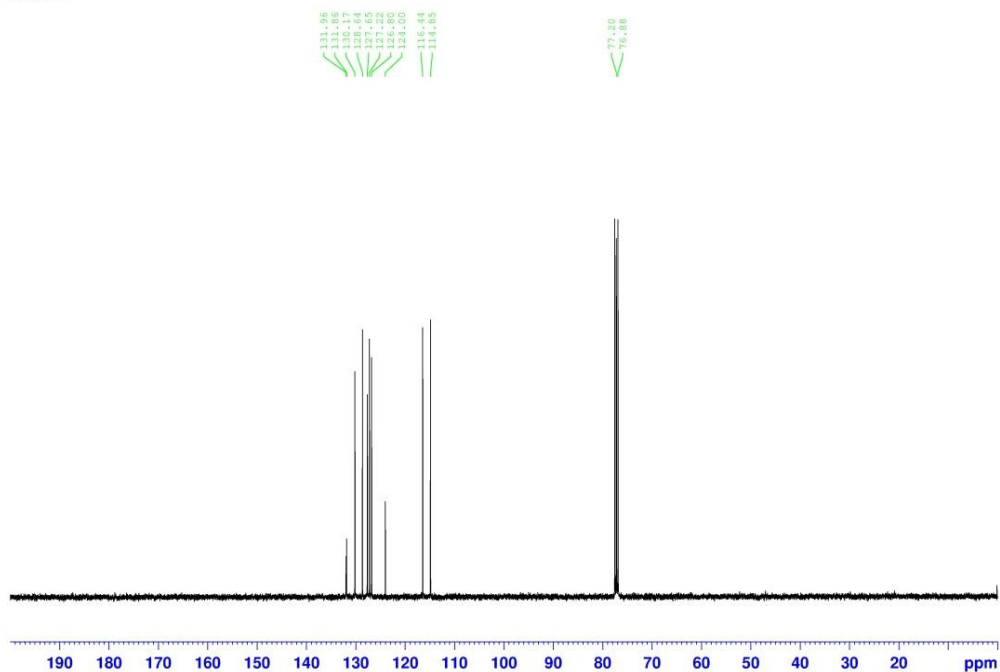

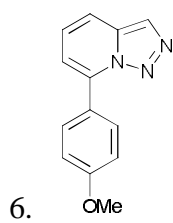

zg-69

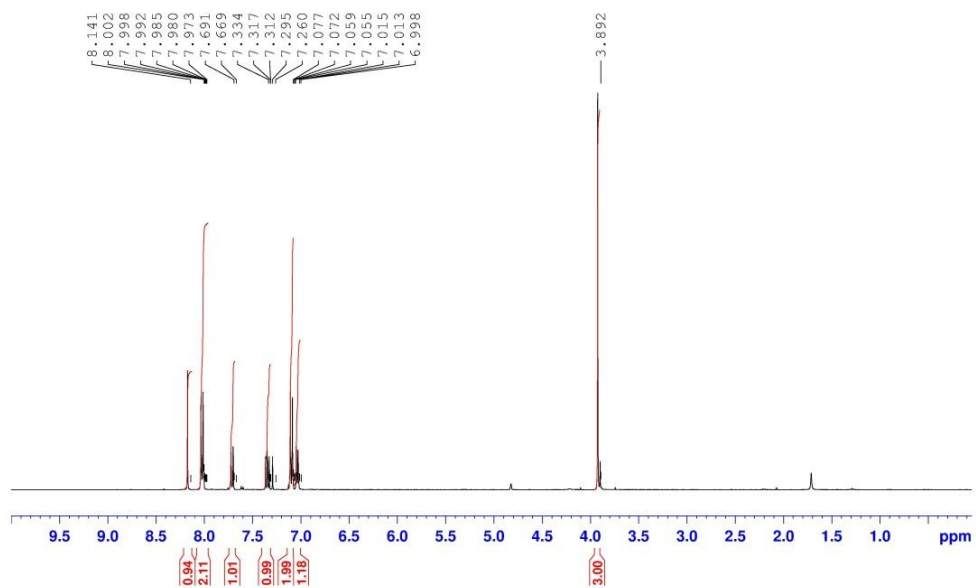

zg-69

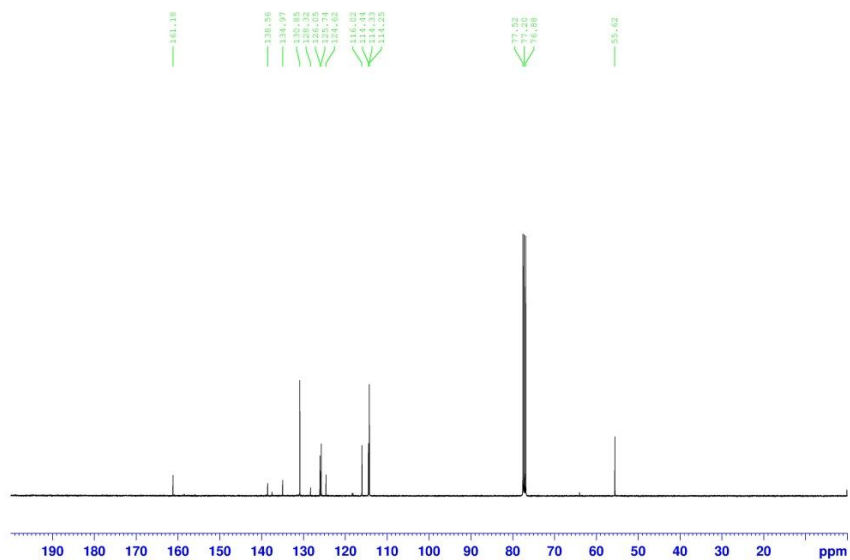

7.

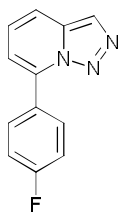

ZG-72 triazole

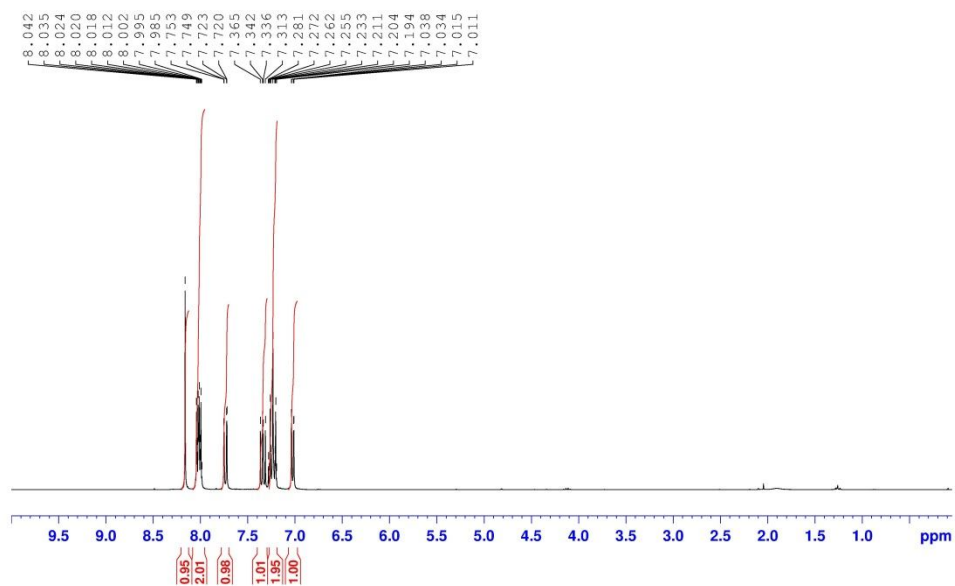

ZG-72 triazole

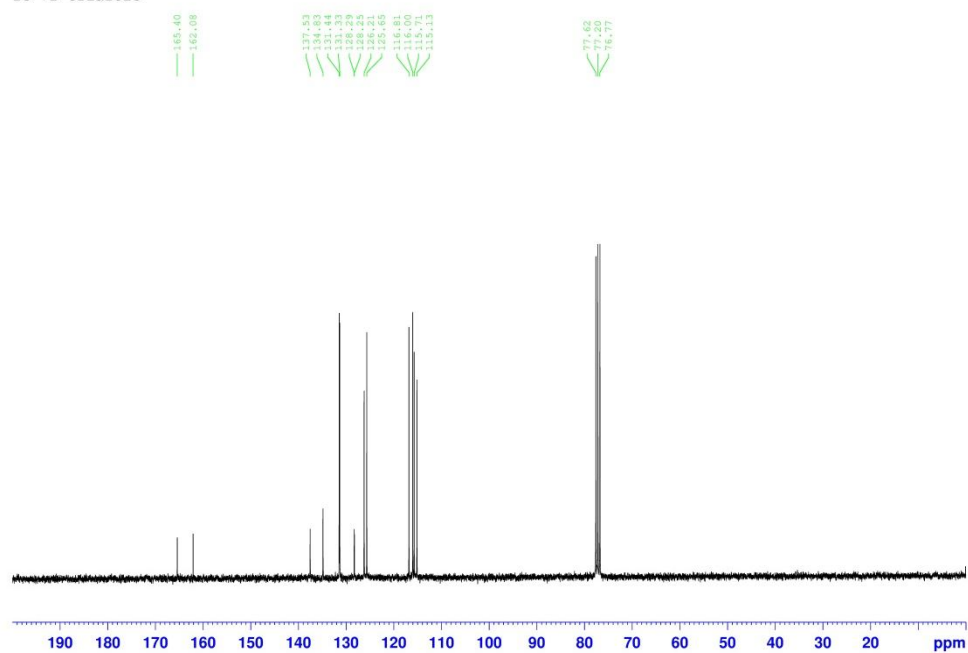

8.

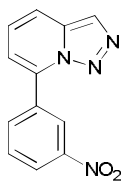

zg-70, pure triazole

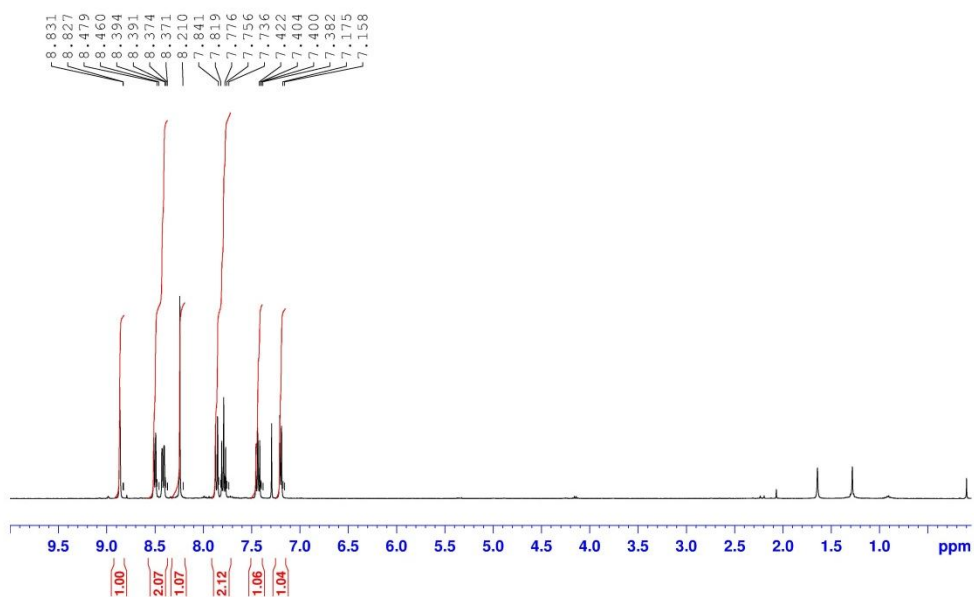

zg-70, pure triazole

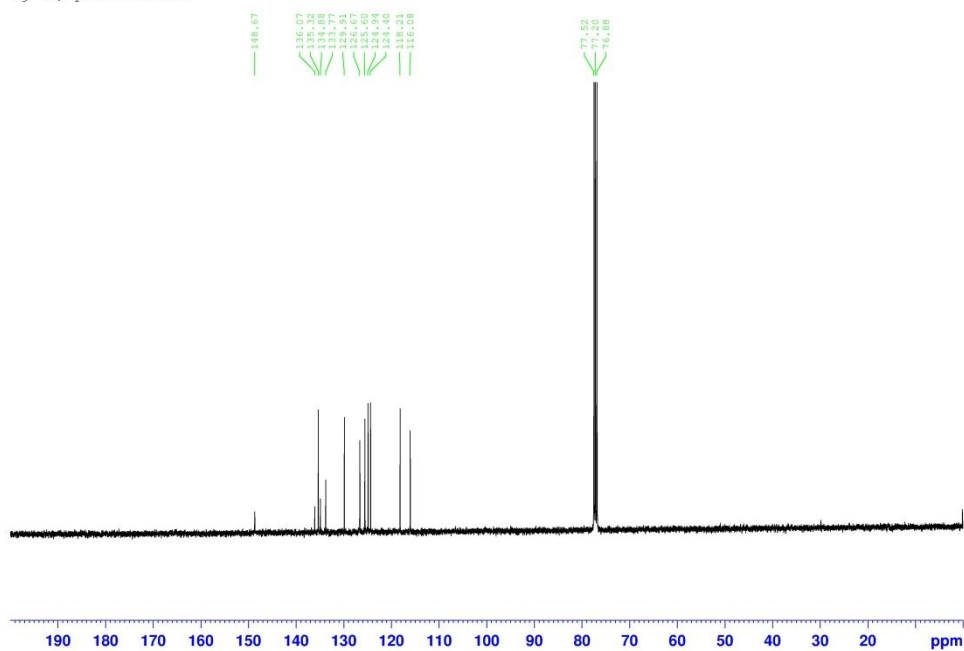

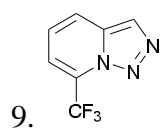

SZG 29, repeat with MnO<sub>2</sub>, purified product

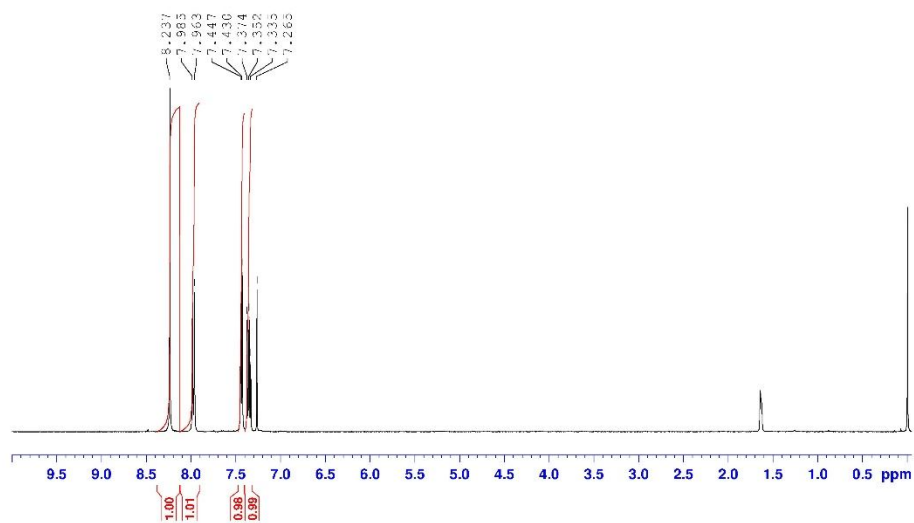

SZG-29, repeat with MnO<sub>2</sub>, purified product

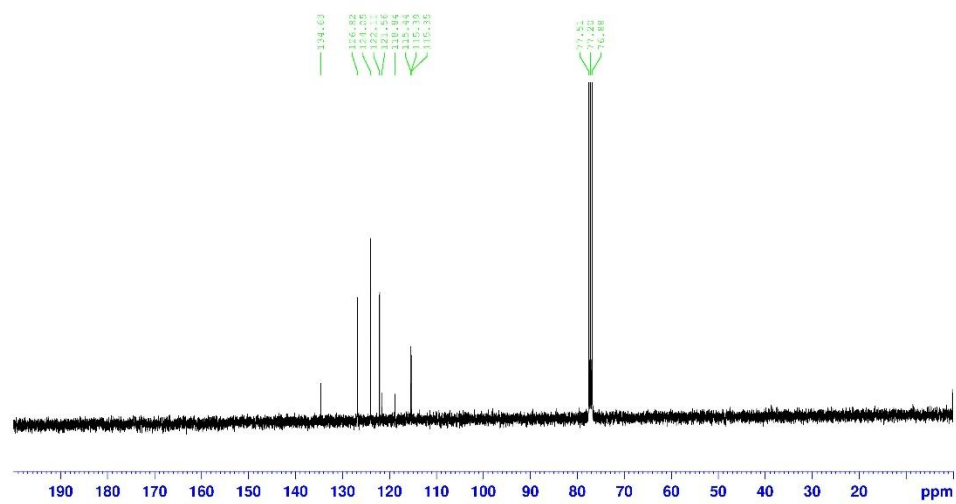

10.

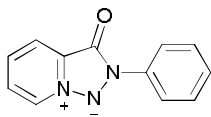

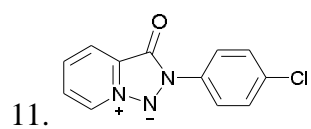

zq-40A, pure product

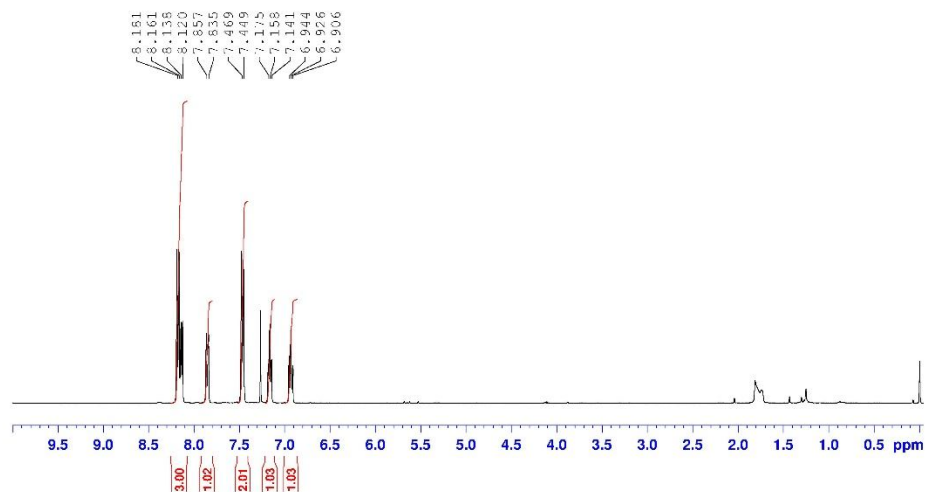

zq-40A, pure product

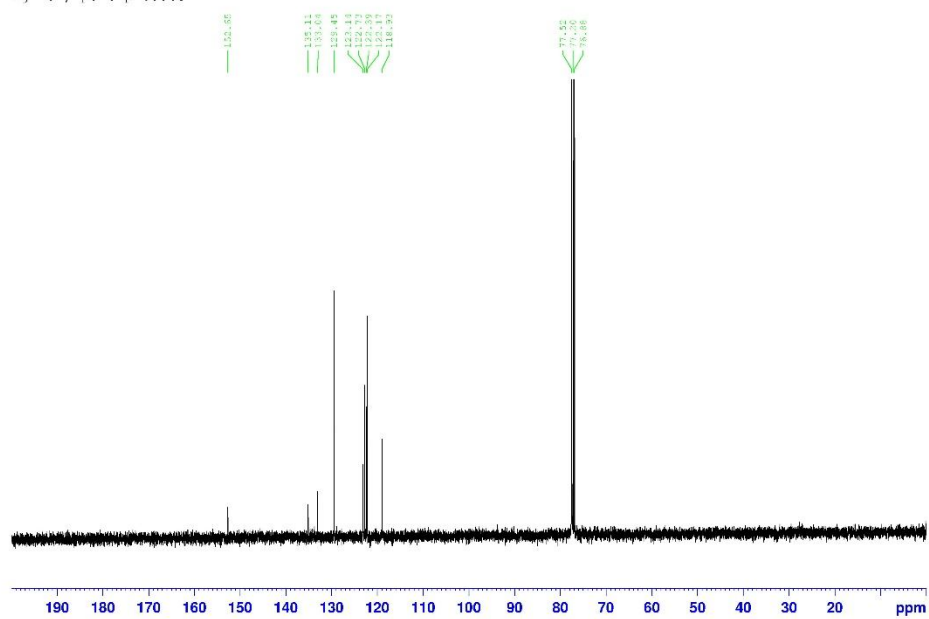

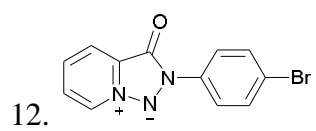

zg 4bA, after column

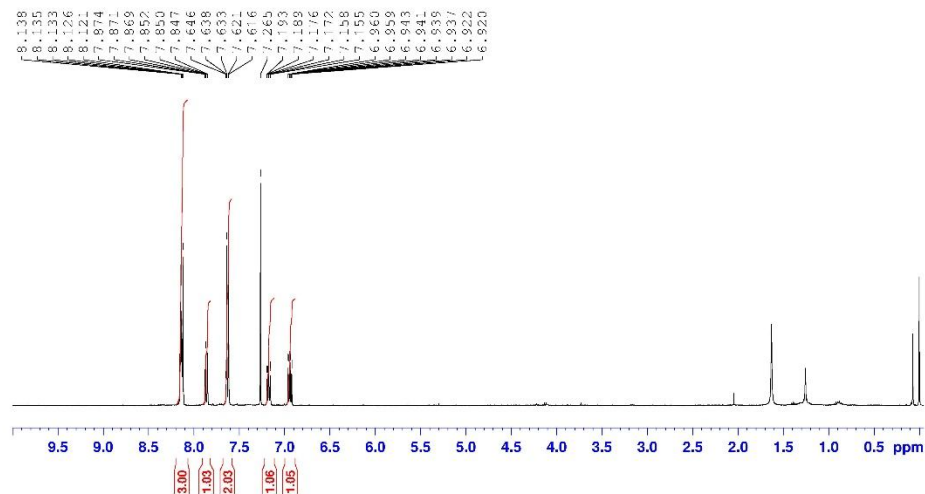

zg-45A, after column

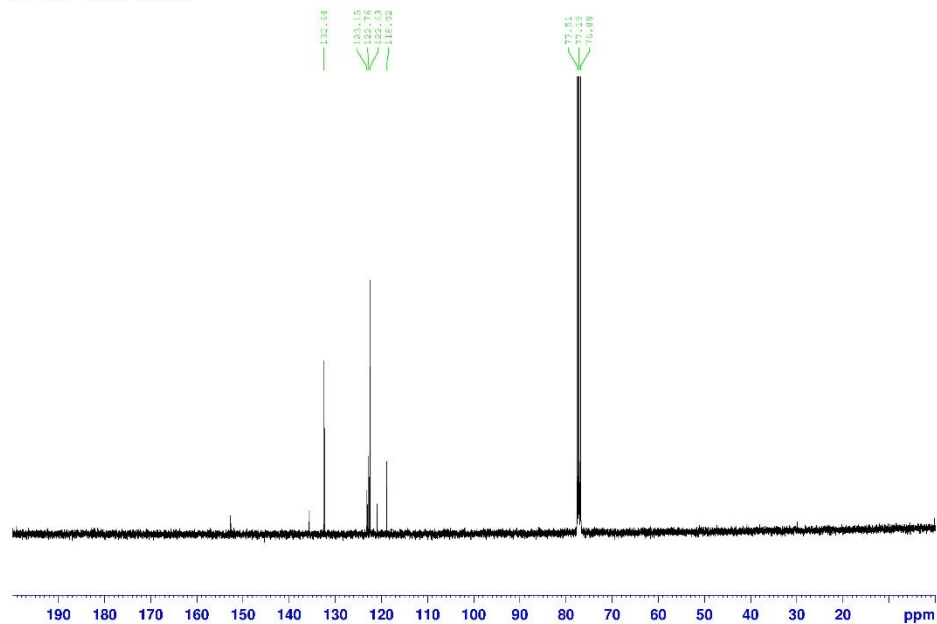





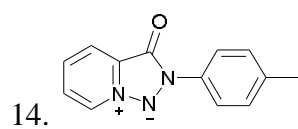

zg-67

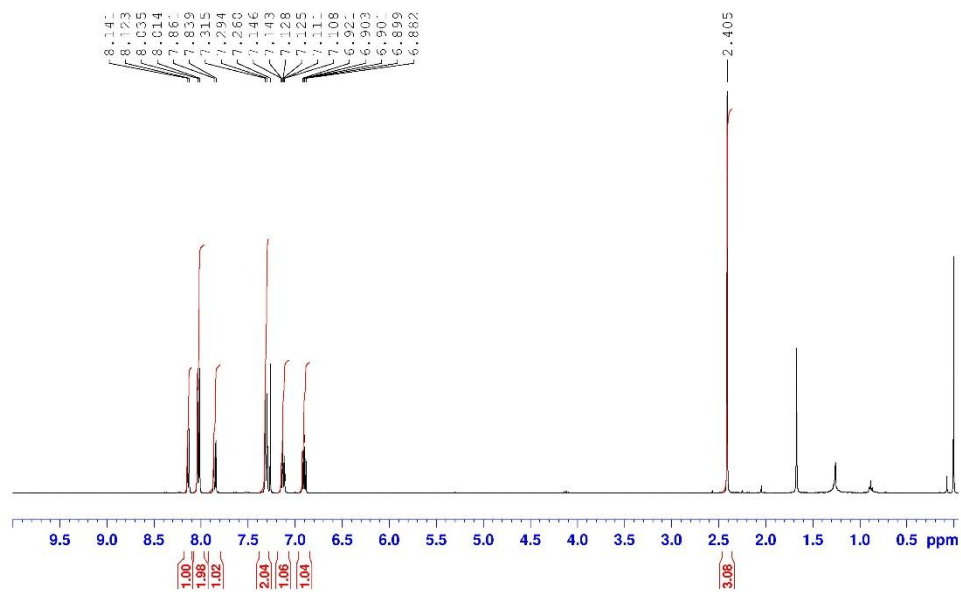

zg-67

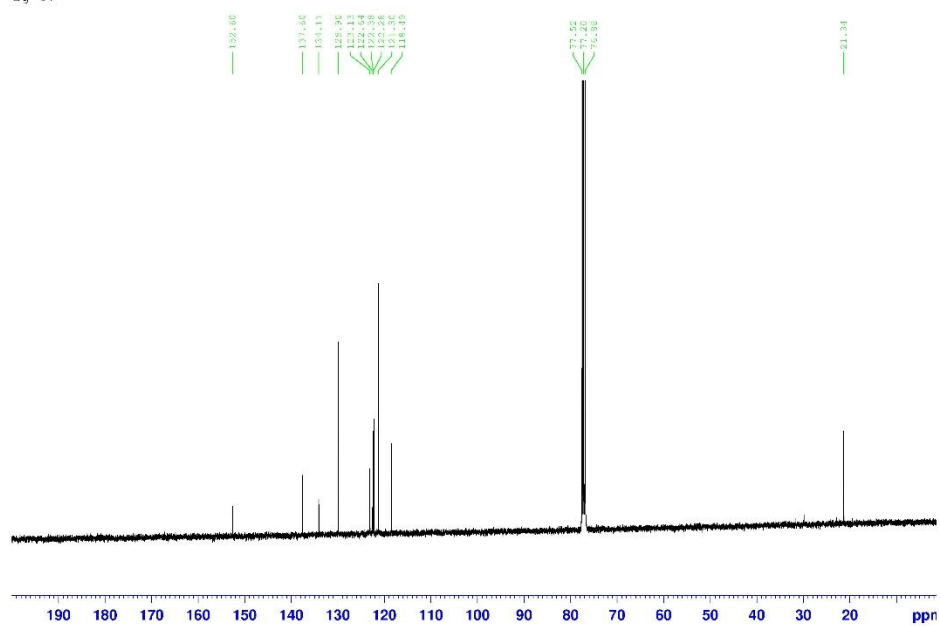

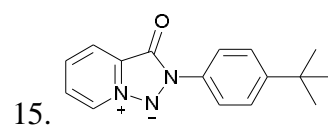

SZG-72

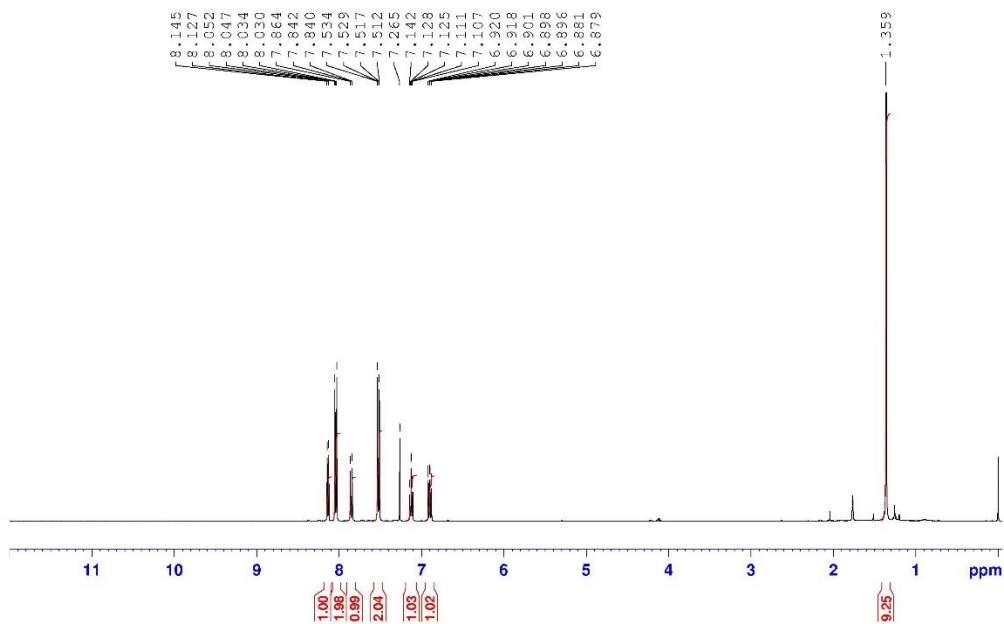

SZG-72

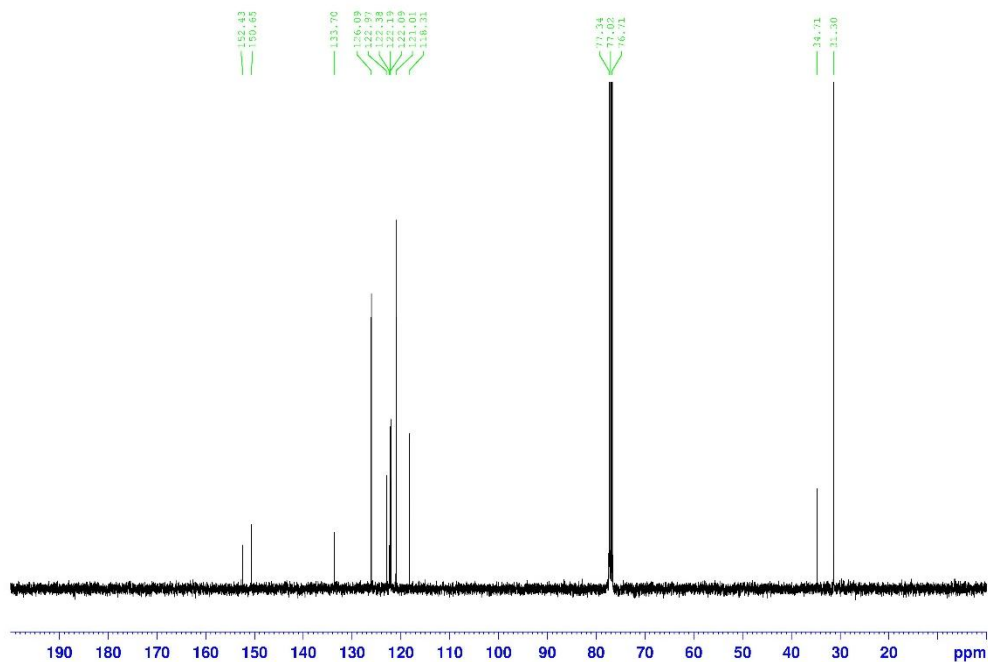

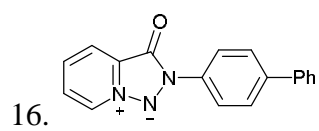

S7G-24

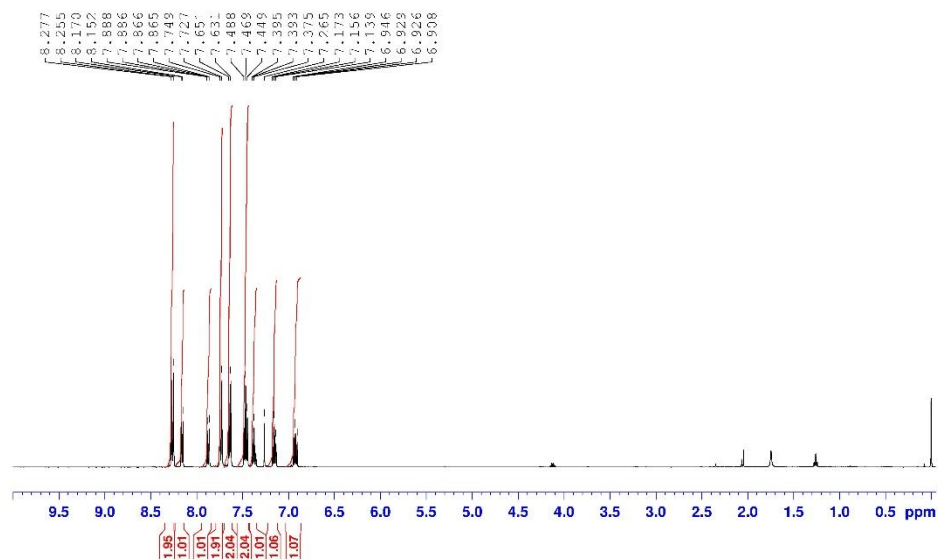

S7G-24

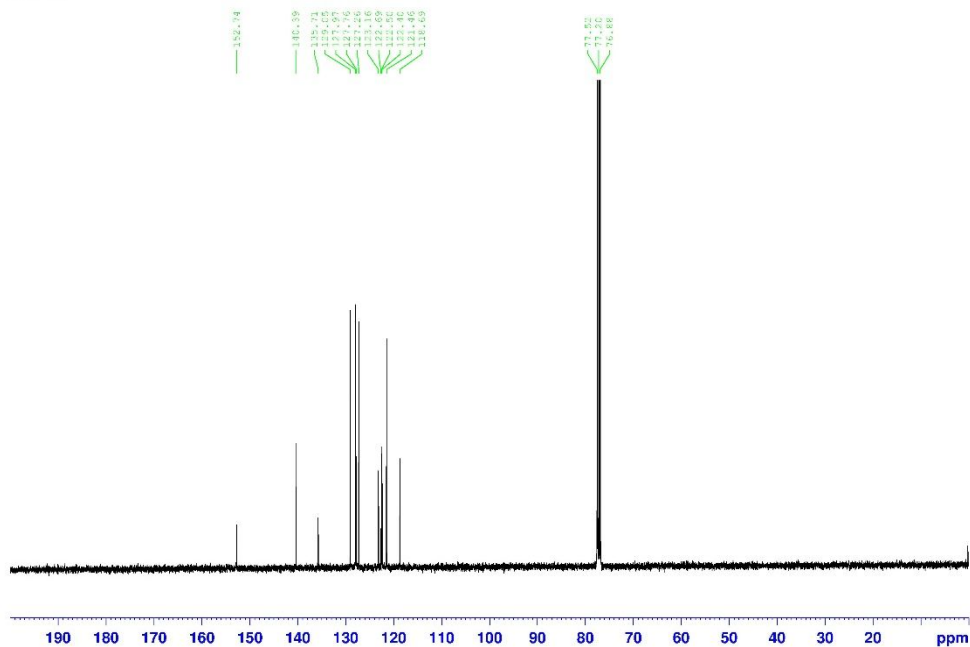

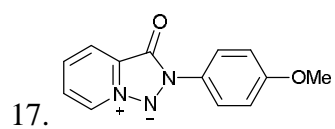

SZG-49

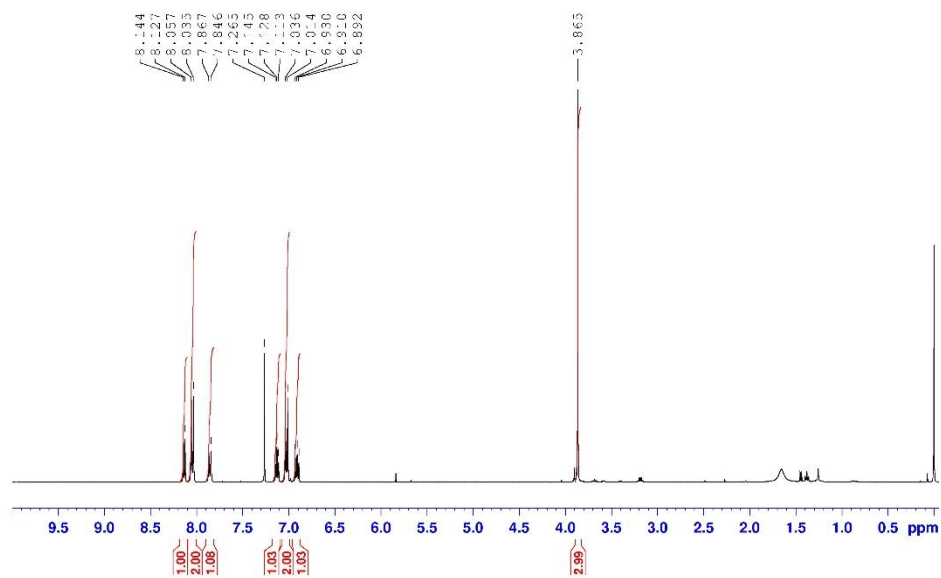

SZG 49

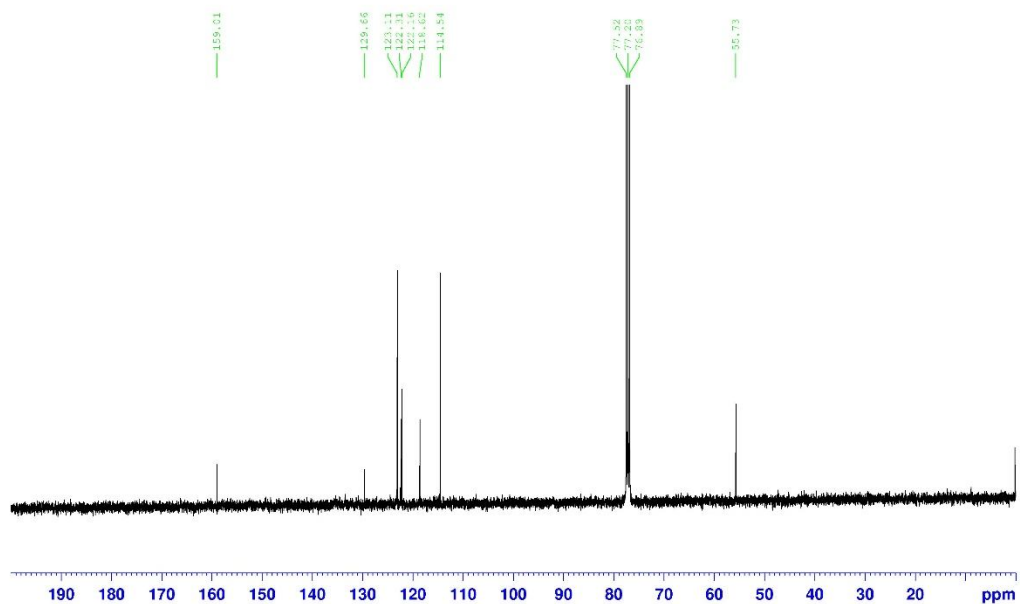

O=[N+]1c2ccccc2n1C(=O)c3ccc([N+](=O)[O-])cc3

<sup>1</sup>H NMR spectrum of compound 10 in CDCl<sub>3</sub>. The spectrum shows peaks in the aromatic region (6.5-8.6 ppm) and aliphatic region (1.2-1.6 ppm). Integration values are provided below the peaks.

| Chemical Shift (ppm) | Integration |
|----------------------|-------------|
| 8.558                | 2.00        |
| 8.553                | 2.02        |
| 8.540                | 2.02        |
| 8.532                | 1.05        |
| 8.404                | 1.00        |
| 8.393                |             |
| 8.385                |             |
| 8.381                |             |
| 8.207                |             |
| 8.189                |             |
| 7.923                |             |
| 7.901                |             |
| 7.282                | 0.93        |
| 7.269                |             |
| 7.266                |             |
| 7.251                |             |
| 7.248                |             |
| 7.036                | 1.08        |
| 7.017                |             |
| 7.015                |             |
| 6.997                |             |
| 1.55                 |             |
| 1.45                 |             |
| 1.35                 |             |
| 1.25                 |             |
| 1.15                 |             |
| 1.05                 |             |
| 0.95                 |             |
| 0.85                 |             |
| 0.75                 |             |
| 0.65                 |             |
| 0.55                 |             |
| 0.45                 |             |
| 0.35                 |             |
| 0.25                 |             |
| 0.15                 |             |
| 0.05                 |             |

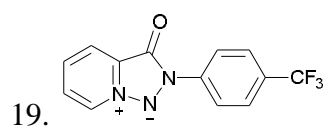

zg-63A, product

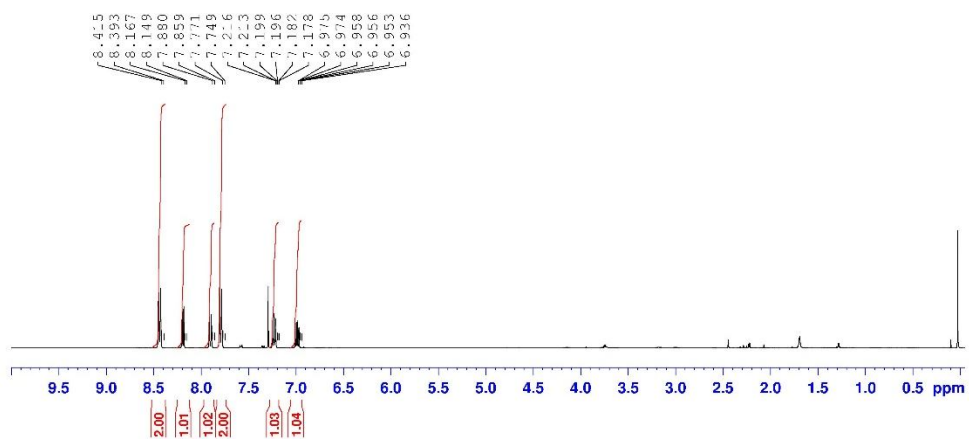

zg-63A, product

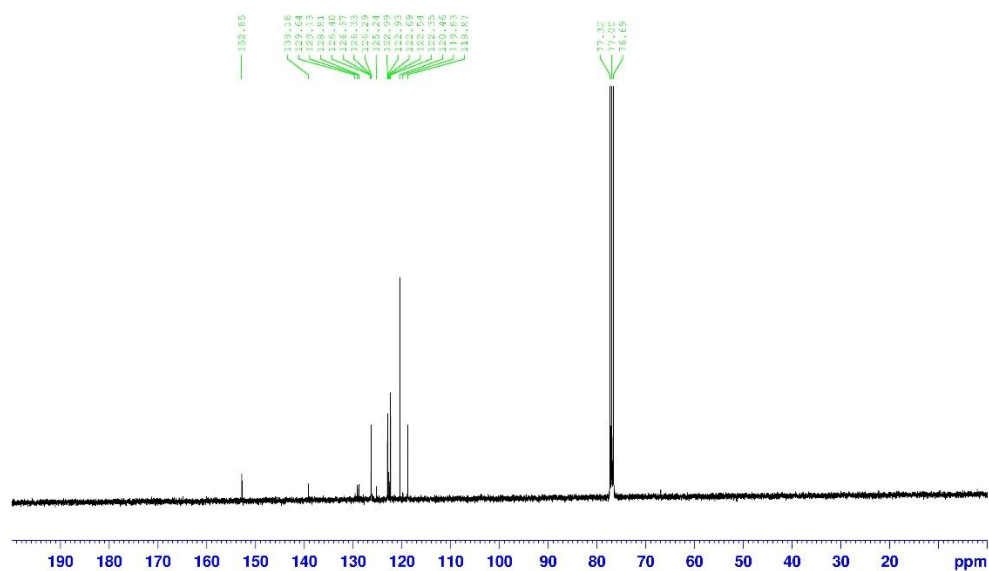





21.

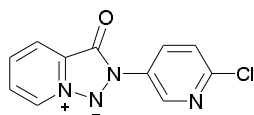

ZG-63B, the chloropyridyl product

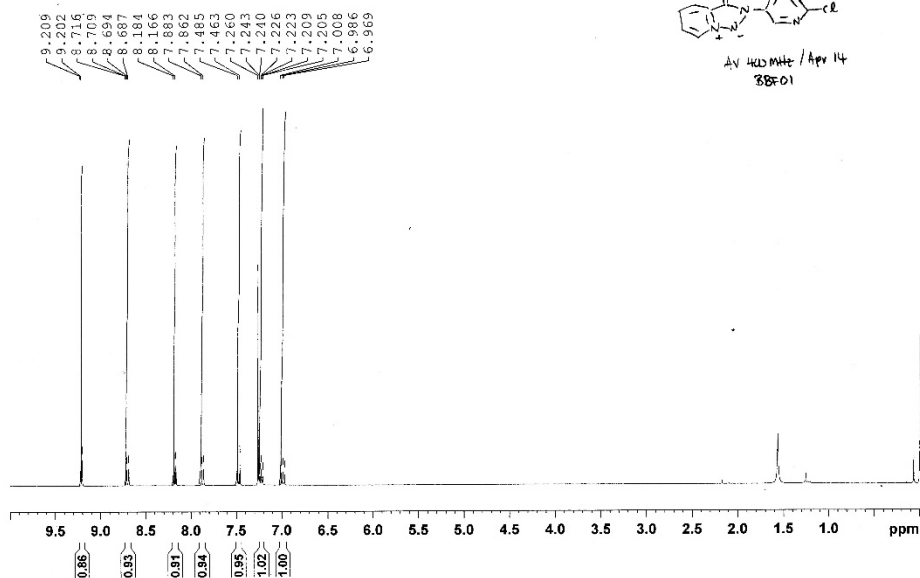

ZG-63B, the chloropyridyl product

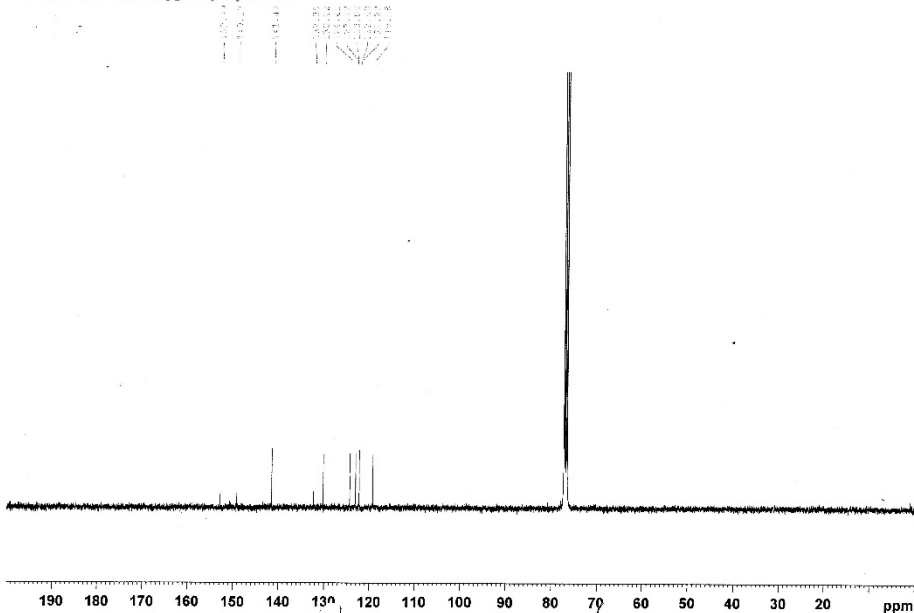

22.

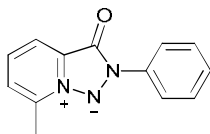

zg-58B, the main spot

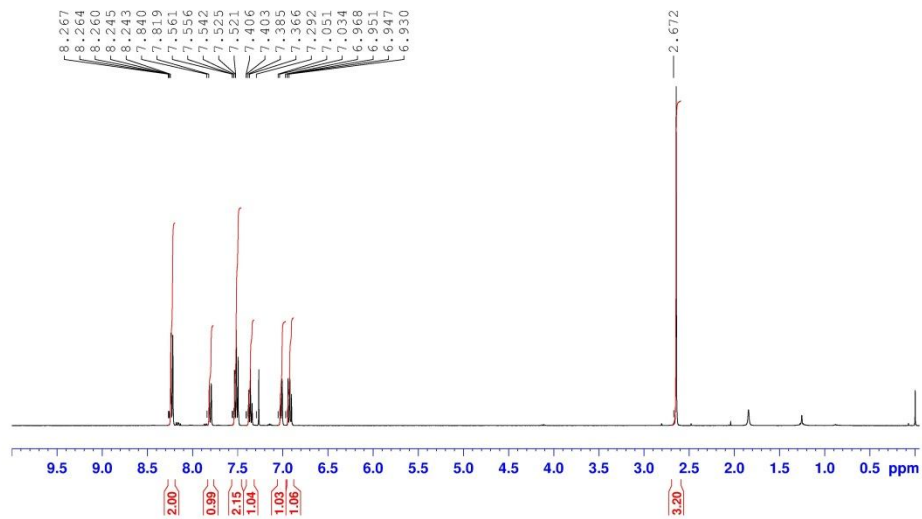

zg-58B, the main spot

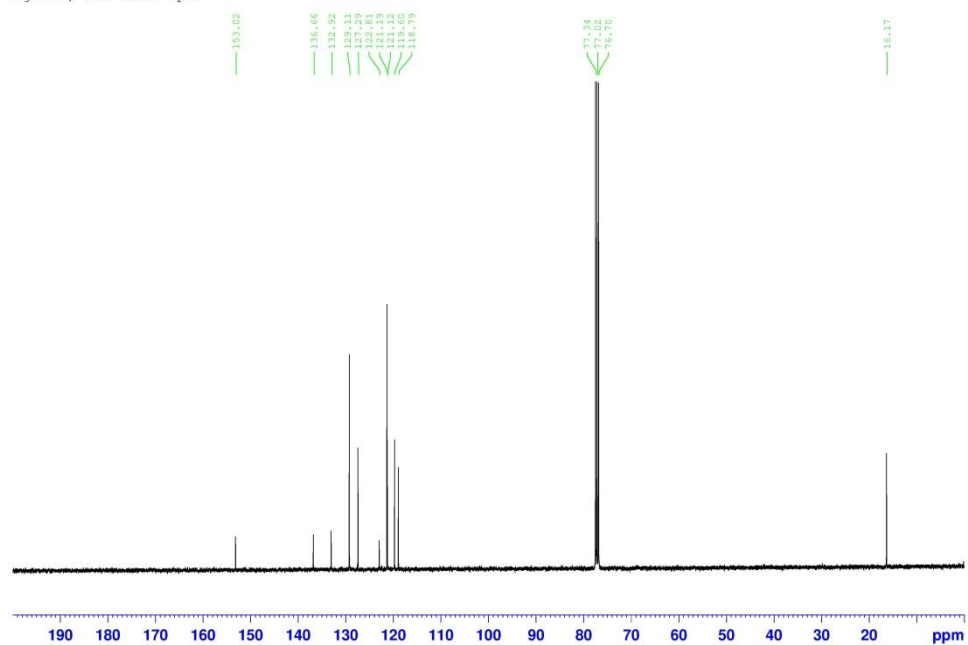

23.

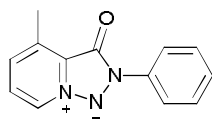

SZG-71B

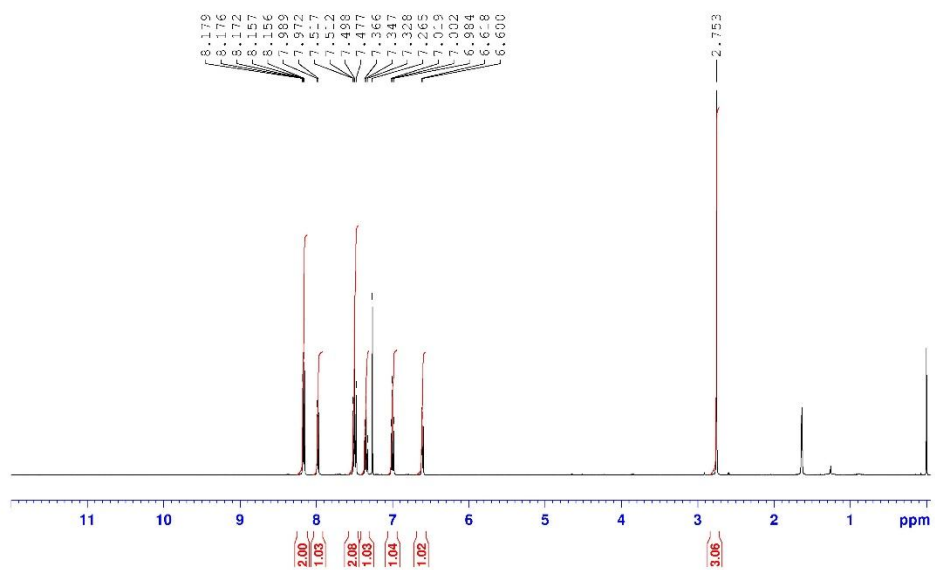

SZG-71B

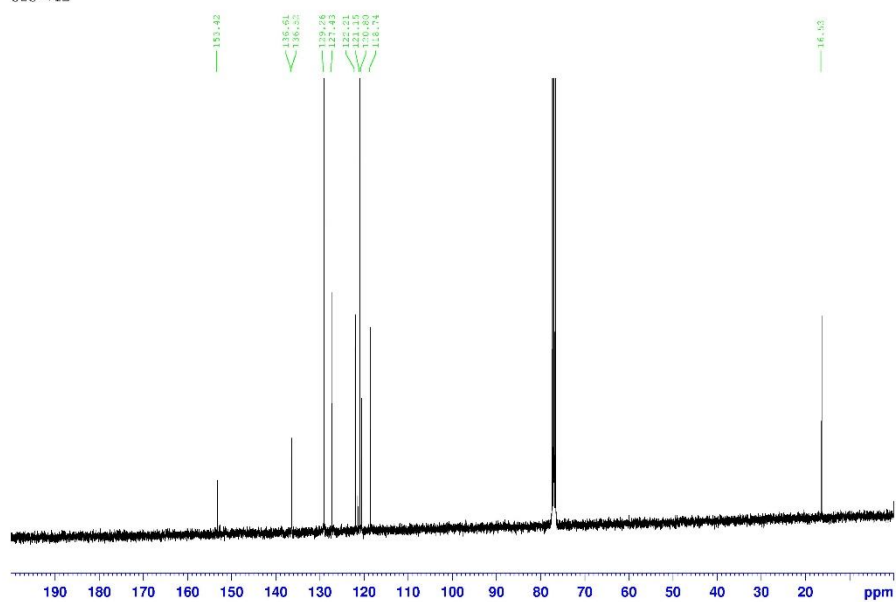

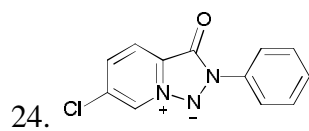

SZG-54

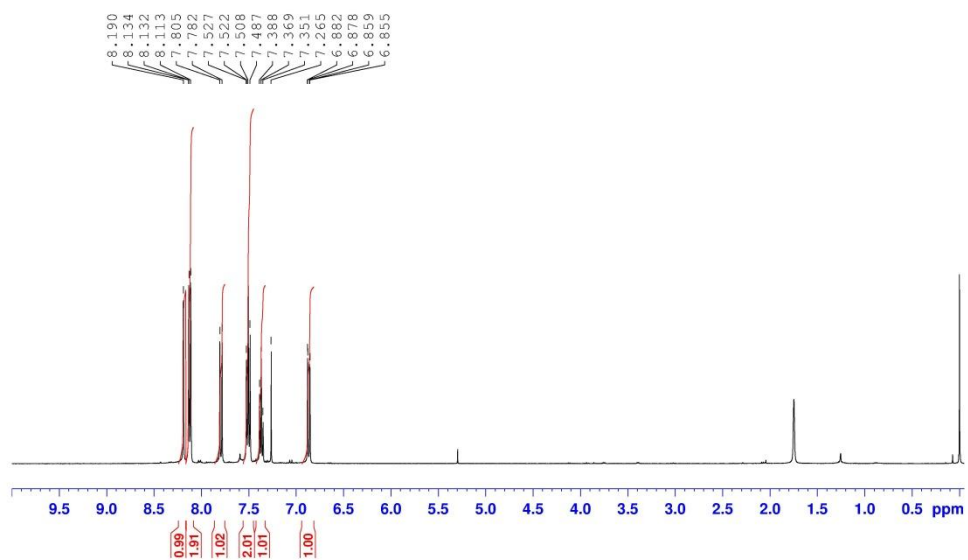

SZG-54

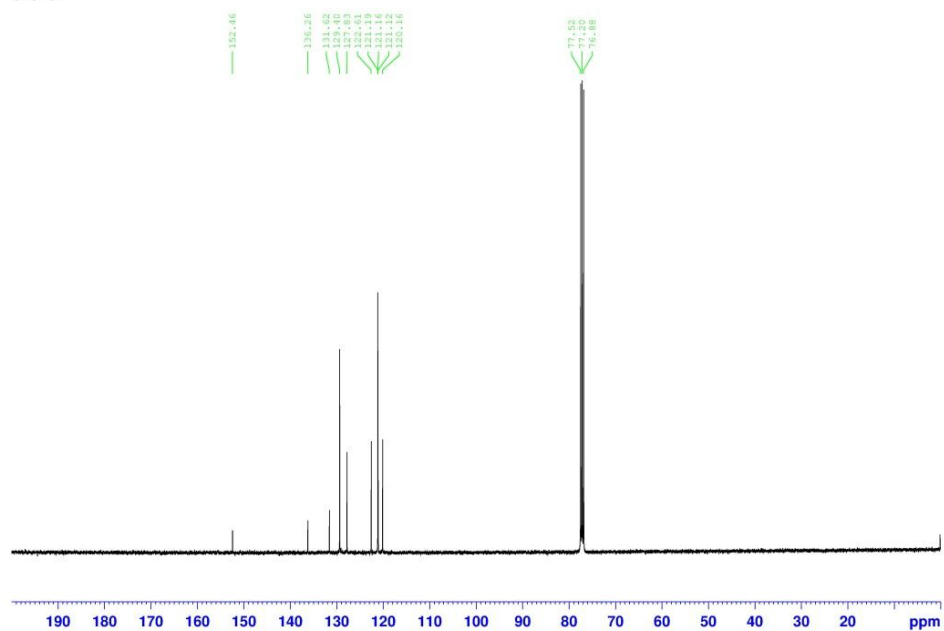

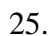

<sup>1</sup>H NMR spectrum of compound 10 in CDCl<sub>3</sub>. The spectrum shows a complex aromatic region between 6.5 and 8.4 ppm with multiple peaks and integrations. A reference peak for TMS is at 0 ppm. A solvent peak for CDCl<sub>3</sub> is visible around 7.26 ppm. Integration values are provided below the baseline for several peak groups.

| Chemical Shift (ppm) | Integration |
|----------------------|-------------|
| 8.309                | 1.00        |
| 8.308                | 2.07        |
| 8.306                |             |
| 8.304                |             |
| 8.302                |             |
| 8.300                |             |
| 8.298                |             |
| 8.296                |             |
| 8.294                |             |
| 8.292                |             |
| 8.290                |             |
| 8.288                |             |
| 8.286                |             |
| 8.284                |             |
| 8.282                |             |
| 8.280                |             |
| 8.278                |             |
| 8.276                |             |
| 8.274                |             |
| 8.272                |             |
| 8.270                |             |
| 8.268                |             |
| 8.266                |             |
| 8.264                |             |
| 8.262                |             |
| 8.260                |             |
| 8.258                |             |
| 8.256                |             |
| 8.254                |             |
| 8.252                |             |
| 8.250                |             |
| 8.248                |             |
| 8.246                |             |
| 8.244                |             |
| 8.242                |             |
| 8.240                |             |
| 8.238                |             |
| 8.236                |             |
| 8.234                |             |
| 8.232                |             |
| 8.230                |             |
| 8.228                |             |
| 8.226                |             |
| 8.224                |             |
| 8.222                |             |
| 8.220                |             |
| 8.218                |             |
| 8.216                |             |
| 8.214                |             |
| 8.212                |             |
| 8.210                |             |
| 8.208                |             |
| 8.206                |             |
| 8.204                |             |
| 8.202                |             |
| 8.200                |             |
| 8.198                |             |
| 8.196                |             |
| 8.194                |             |
| 8.192                |             |
| 8.190                |             |
| 8.188                |             |
| 8.186                |             |
| 8.184                |             |
| 8.182                |             |
| 8.180                |             |
| 8.178                |             |
| 8.176                |             |
| 8.174                |             |
| 8.172                |             |
| 8.170                |             |
| 8.168                |             |
| 8.166                |             |
| 8.164                |             |
| 8.162                |             |
| 8.160                |             |
| 8.158                |             |
| 8.156                |             |
| 8.154                |             |
| 8.152                |             |
| 8.150                |             |
| 8.148                |             |
| 8.146                |             |
| 8.144                |             |
| 8.142                |             |
| 8.140                |             |
| 8.138                |             |
| 8.136                |             |
| 8.134                |             |
| 8.132                |             |
| 8.130                |             |
| 8.128                |             |
| 8.126                |             |
| 8.124                |             |
| 8.122                |             |
| 8.120                |             |
| 8.118                |             |
| 8.116                |             |
| 8.114                |             |
| 8.112                |             |
| 8.110                |             |
| 8.108                |             |
| 8.106                |             |
| 8.104                |             |
| 8.102                |             |
| 8.100                |             |
| 8.098                |             |
| 8.096                |             |
| 8.094                |             |
| 8.092                |             |
| 8.090                |             |
| 8.088                |             |
| 8.086                |             |
| 8.084                |             |
| 8.082                |             |
| 8.080                |             |
| 8.078                |             |
| 8.076                |             |
| 8.074                |             |
| 8.072                |             |
| 8.070                |             |
| 8.068                |             |
| 8.066                |             |
| 8.064                |             |
| 8.062                |             |
| 8.060                |             |
| 8.058                |             |
| 8.056                |             |
| 8.054                |             |
| 8.052                |             |
| 8.050                |             |
| 8.048                |             |
| 8.046                |             |
| 8.044                |             |
| 8.042                |             |
| 8.040                |             |
| 8.038                |             |
| 8.036                |             |
| 8.034                |             |
| 8.032                |             |
| 8.030                |             |
| 8.028                |             |
| 8.026                |             |
| 8.024                |             |
| 8.022                |             |
| 8.020                |             |
| 8.018                |             |
| 8.016                |             |
| 8.014                |             |
| 8.012                |             |
| 8.010                |             |
| 8.008                |             |
| 8.006                |             |
| 8.004                |             |
| 8.002                |             |
| 8.000                |             |
| 7.998                |             |
| 7.996                |             |
| 7.994                |             |
| 7.992                |             |
| 7.990                |             |
| 7.988                |             |
| 7.986                |             |
| 7.984                |             |
| 7.982                |             |
| 7.980                |             |
| 7.978                |             |
| 7.976                | </          |

138.36  
136.06  
135.98  
135.24  
134.82  
134.42  
133.97  
133.47  
132.17  
131.92  
131.05  
129.62  
77.32  
77.33  
76.71

26.

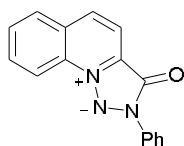

SZG-26

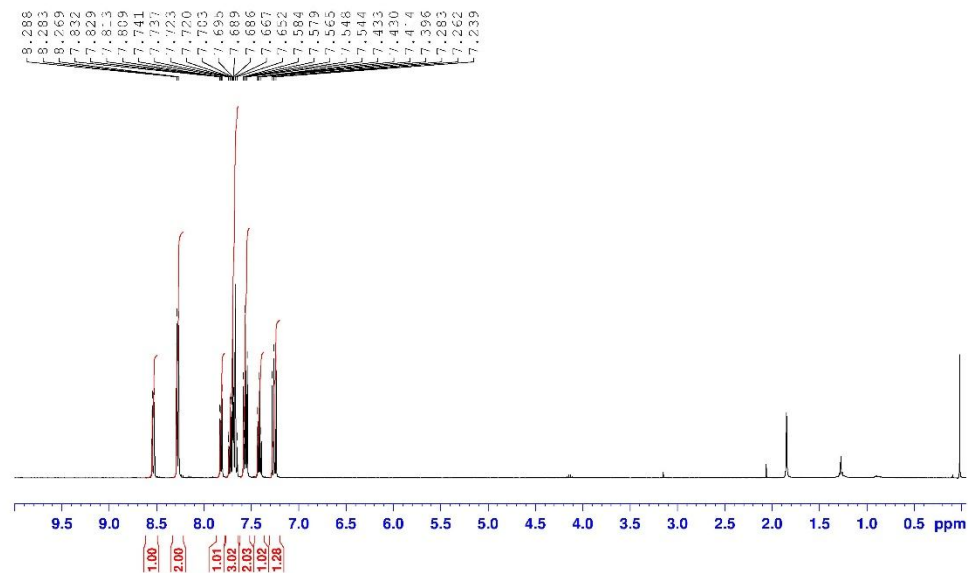

SZG 26

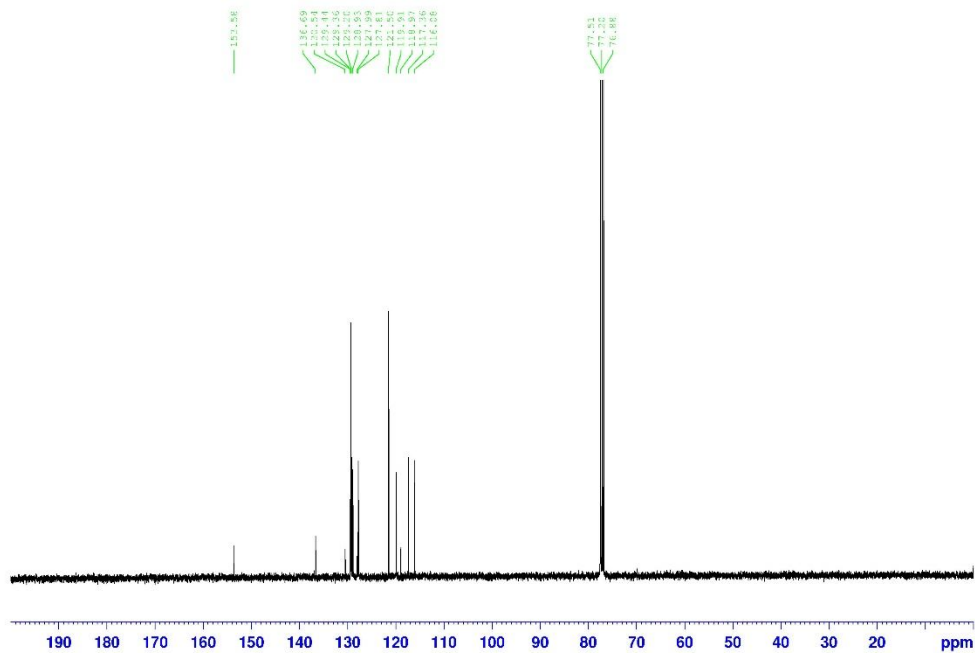

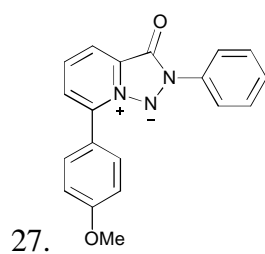

zg-71B, column product

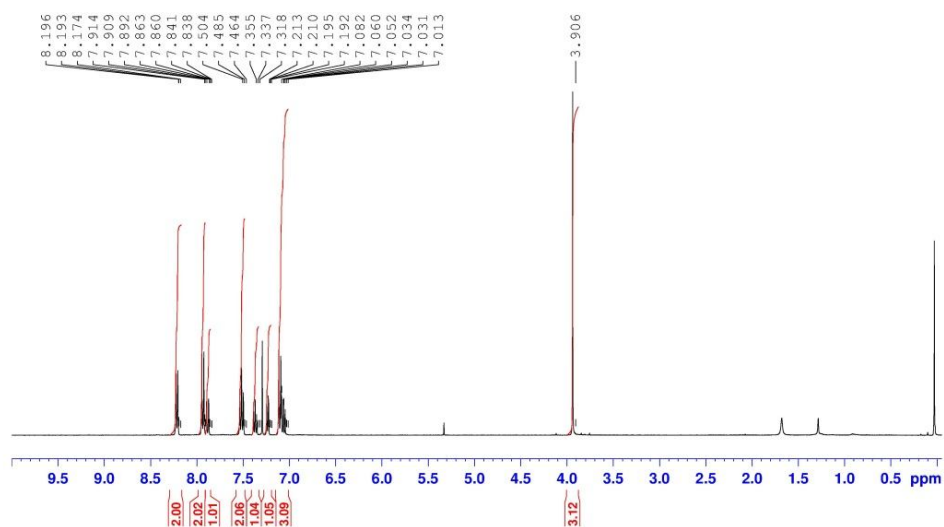

zg-71B, column product

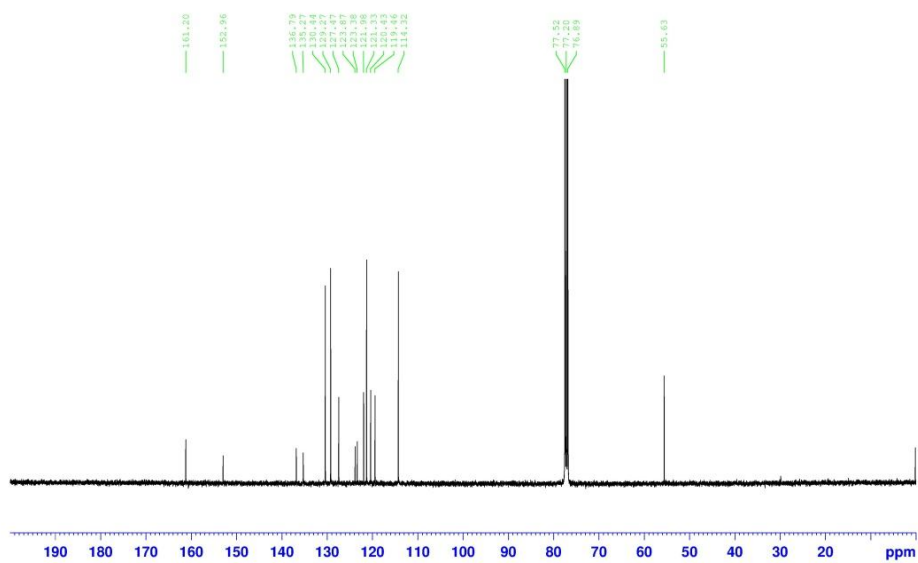

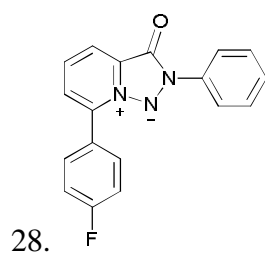

zg-79p, column product

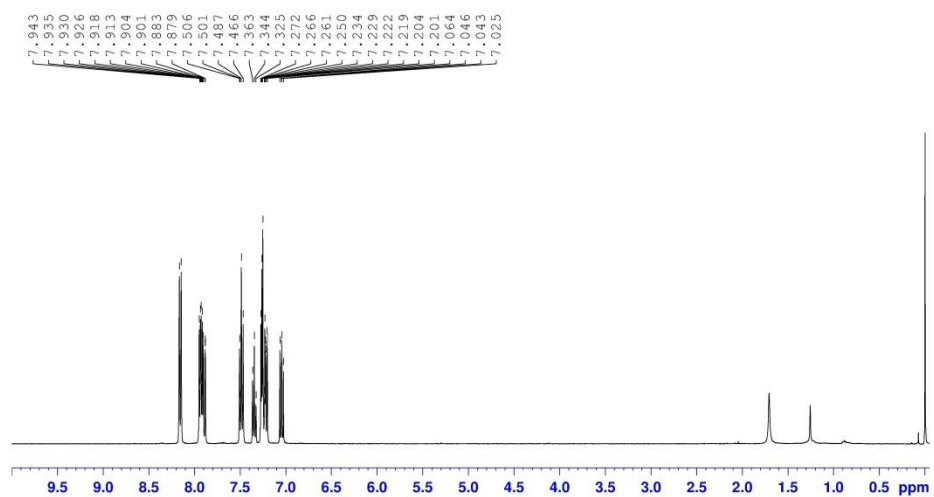

zg-79p, column product

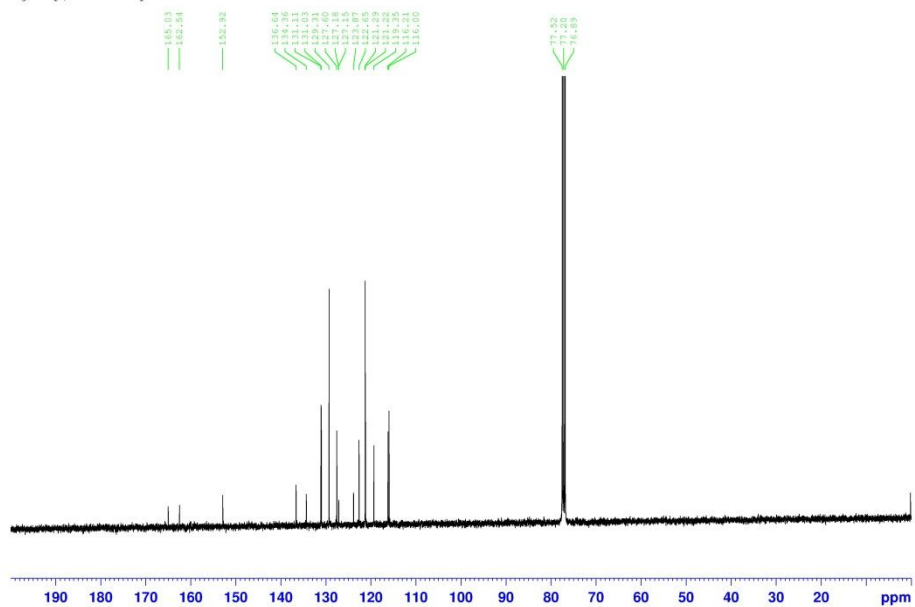



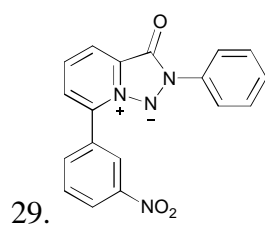

SZG-30

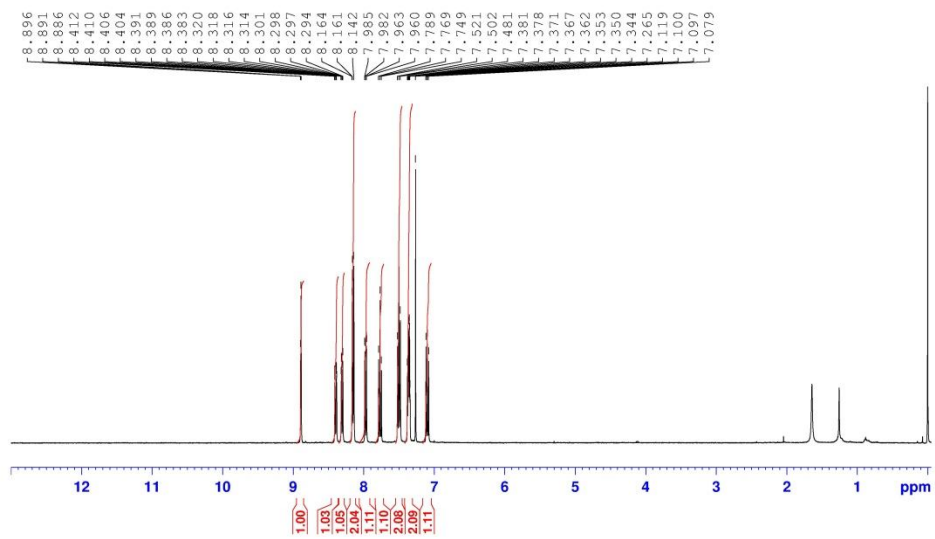

SZG-30

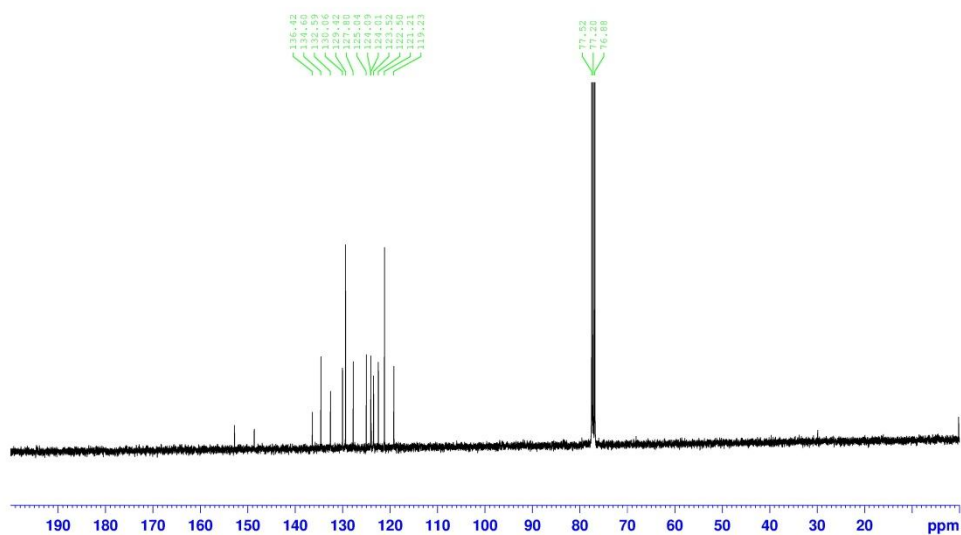

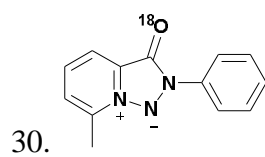

SZG-59

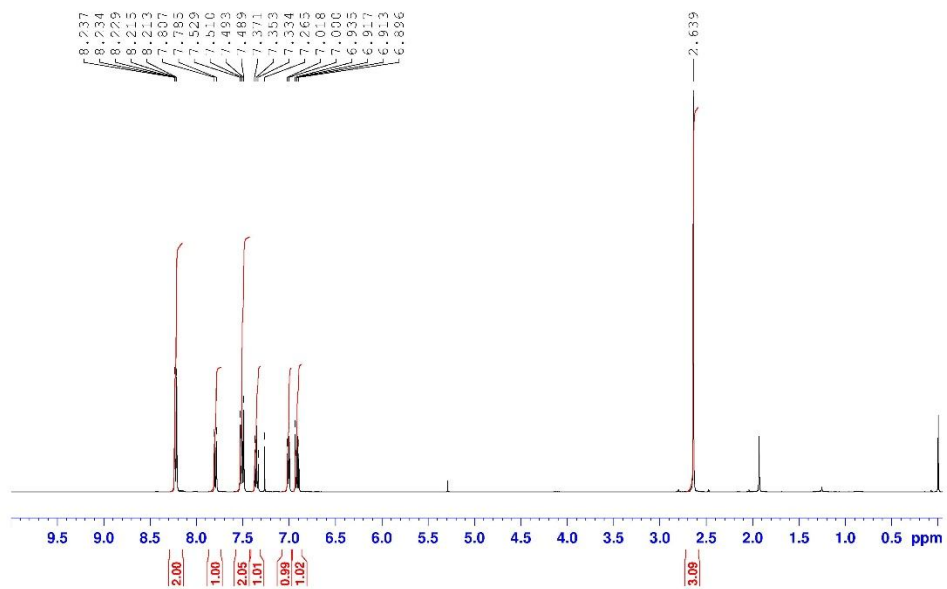

SZG-59

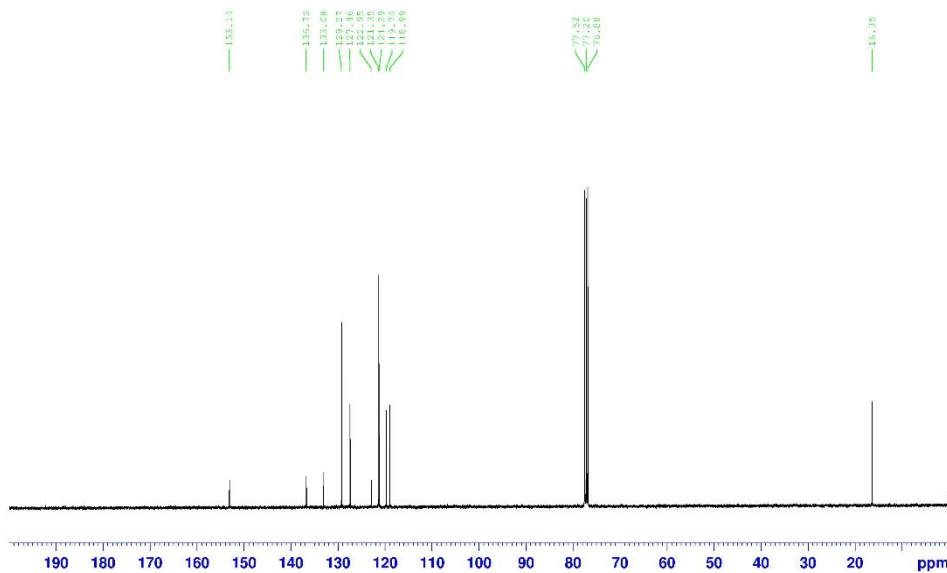

31.

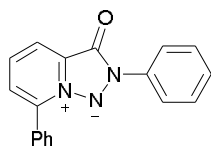

SZG35

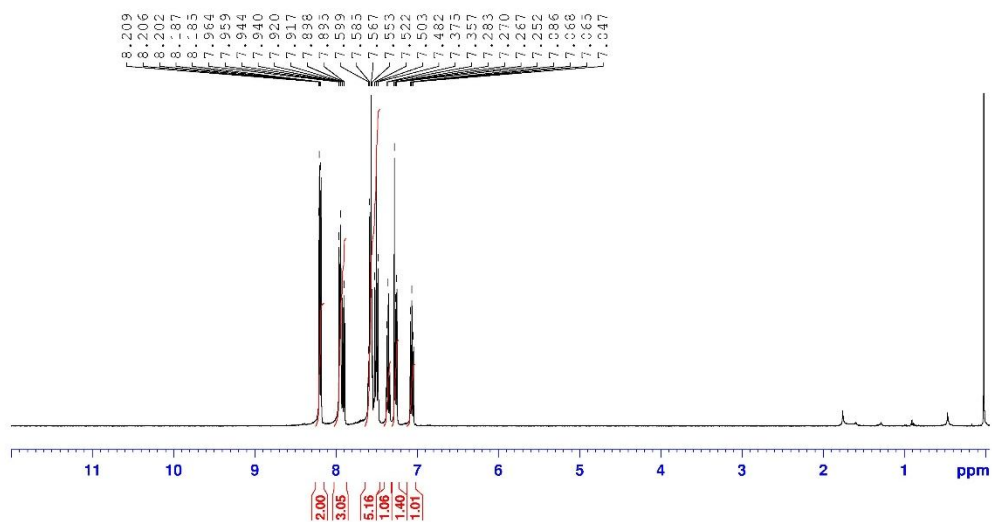

57G-39

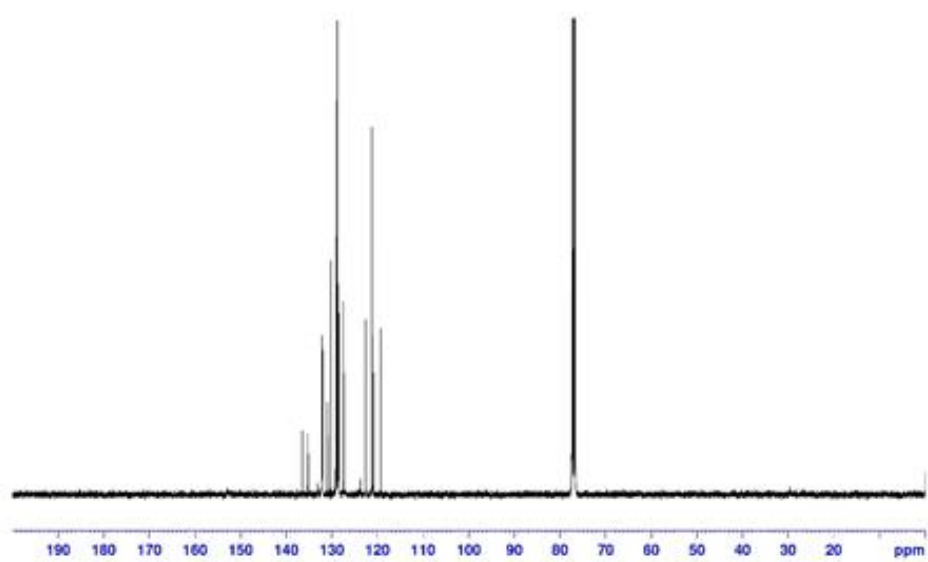

32.

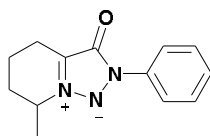

SZC-42

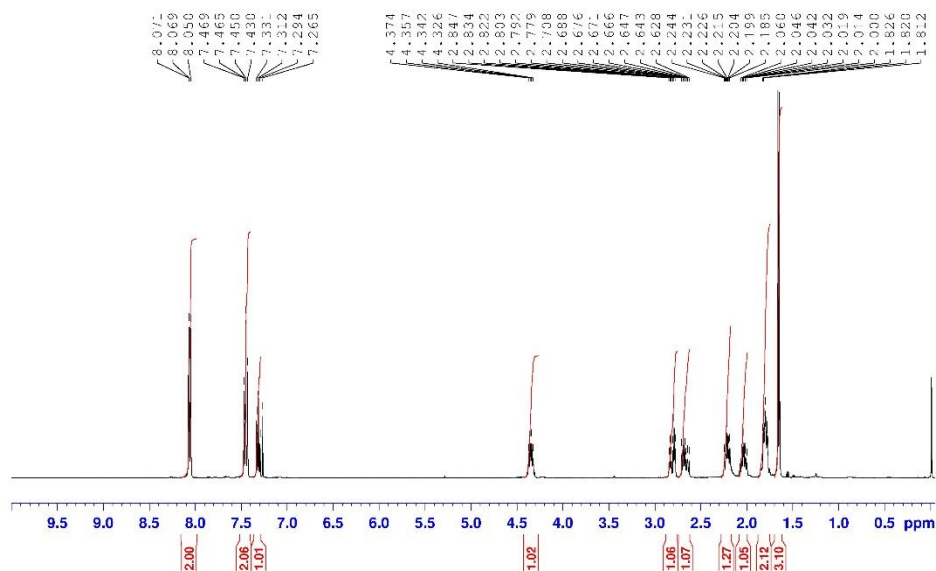

SZC-42

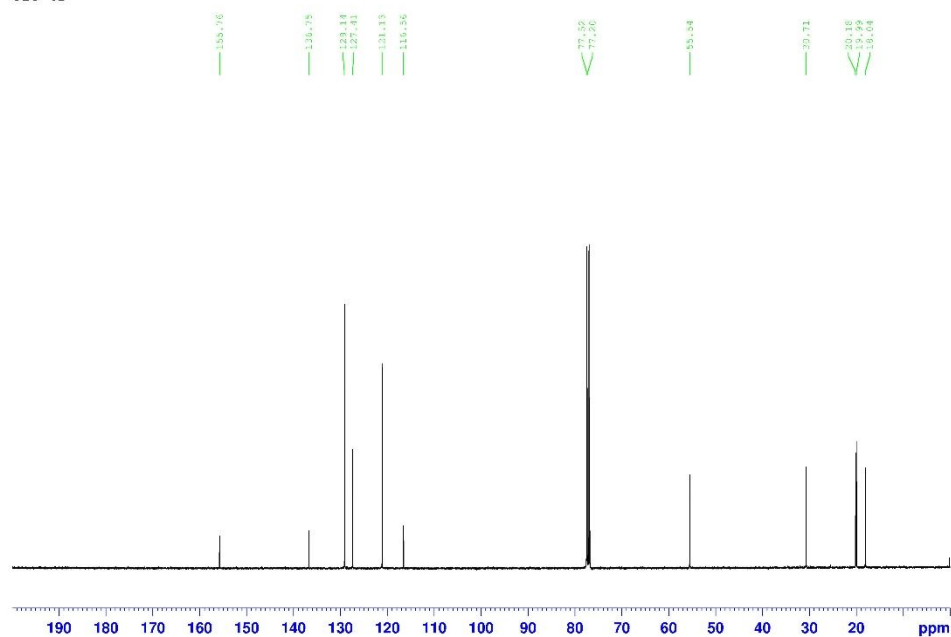

Supplement: c4cc10061a1.pdf [file c4cc10061a1.pdf]
